# Supplementary material for: SETD2-Dependent Histone H3K36 Trimethylation Is Required for Homologous Recombination Repair and Genome Stability
Source: PubMed Central journal article supplement — Cell Rep. 2014 Jun 12;7(6):2006–18. doi: 10.1016/j.celrep.2014.05.026 (PMC4074340; doi:10.1016/j.celrep.2014.05.026), 2014-06-12
Supplement: mmc2.pdf [file mmc2.pdf]

# SETD2-Dependent Histone H3K36 Trimethylation Is Required for Homologous Recombination Repair and Genome Stability

Sophia X. Pfister,<sup>1</sup> Sara Ahrabi,<sup>1</sup> Lykourgos-Panagiotis Zalmas,<sup>2</sup> Sovan Sarkar,<sup>1</sup> François Aymard,<sup>3,4</sup> Csanád Z. Bachrati,<sup>5</sup> Thomas Helleday,<sup>6</sup> Gaëlle Legube,<sup>3,4</sup> Nicholas B. La Thangue,<sup>2</sup> Andrew C.G. Porter,<sup>7</sup> and Timothy C. Humphrey<sup>1,\*</sup>

<sup>1</sup>CRUK MRC Oxford Institute for Radiation Oncology, Department of Oncology, University of Oxford, Oxford OX3 7DQ, UK

<sup>2</sup>Laboratory of Cancer Biology, Department of Oncology, University of Oxford, Oxford OX3 7DQ, UK

<sup>3</sup>Laboratoire de Biologie Cellulaire et Moléculaire du Contrôle de la Prolifération, Université de Toulouse, Université Paul Sabatier, 31062 Toulouse, France

<sup>4</sup>CNRS, Laboratoire de Biologie Cellulaire et Moléculaire du Contrôle de la Prolifération, 31062 Toulouse, France

<sup>5</sup>School of Life Sciences, University of Lincoln, Lincoln LN6 7TS, UK

<sup>6</sup>Science for Life Laboratory, Division of Translational Medicine and Chemical Biology, Department of Medical Biochemistry and Biophysics, Karolinska Institutet, 171 21 Stockholm, Sweden

<sup>7</sup>Gene Targeting Group, Centre for Haematology, Imperial College Faculty of Medicine, London W12 0NN, UK

\*Correspondence: [timothy.humphrey@oncology.ox.ac.uk](mailto:timothy.humphrey@oncology.ox.ac.uk)

<http://dx.doi.org/10.1016/j.celrep.2014.05.026>

This is an open access article under the CC BY-NC-ND license (<http://creativecommons.org/licenses/by-nc-nd/3.0/>).

## SUMMARY

Modulating chromatin through histone methylation orchestrates numerous cellular processes. SETD2-dependent trimethylation of histone H3K36 is associated with active transcription. Here, we define a role for H3K36 trimethylation in homologous recombination (HR) repair in human cells. We find that depleting SETD2 generates a mutation signature resembling RAD51 depletion at I-SceI-induced DNA double-strand break (DSB) sites, with significantly increased deletions arising through microhomology-mediated end-joining. We establish a presynaptic role for SETD2 methyltransferase in HR, where it facilitates the recruitment of C-terminal binding protein interacting protein (CtIP) and promotes DSB resection, allowing Replication Protein A (RPA) and RAD51 binding to DNA damage sites. Furthermore, reducing H3K36me3 levels by overexpressing KDM4A/JMJD2A, an oncogene and H3K36me3/2 demethylase, or an H3.3K36M transgene also reduces HR repair events. We propose that error-free HR repair within H3K36me3-decorated transcriptionally active genomic regions promotes cell homeostasis. Moreover, these findings provide insights as to why oncogenic mutations cluster within the H3K36me3 axis.

## INTRODUCTION

DNA double-stranded breaks (DSBs) are potentially lethal lesions if unrepaired, and their misrepair can give rise to genome instability, a hallmark of cancer (Jeggo and Lavin, 2009). To maintain genome stability in response to such lesions, cells

employ either homologous recombination (HR) or nonhomologous end-joining (NHEJ) pathways to repair DSBs. HR is initiated by 5' end resection to generate a 3' single-stranded DNA (ssDNA) overhang. Resection is a two-step process initiated by removing a short oligonucleotide through the activities of the Mre11-Rad50-Nbs1 (MRN) complex and CtIP. Extensive resection is performed by Exo1 or DNA2-BLM in conjunction with Replication Protein A (RPA), which binds ssDNA and removes secondary structures (Sugiyama et al., 1998; Symington and Gautier, 2011). This, in turn, leads to RAD51 nucleofilament formation, which promotes strand invasion of a homologous chromatid, leading to accurate repair (Heyer et al., 2010). During classical NHEJ (C-NHEJ), the broken ends are rapidly bound and protected by the Ku70/Ku80 heterodimer, which acts as a platform to recruit the DNA-PK catalytic subunit (DNA-PKcs). Damaged ends are then processed and subsequently joined by the Ligase 4 (Lig4), XRCC4, XLF complex in a template-independent manner, which can lead to inaccurate repair (Lieber, 2010). DSBs may also be repaired through alternative end-joining pathways, such as microhomology-mediated end-joining (MMEJ), which do not require Ku or Lig4. Like HR, MMEJ is initiated by resection, and end-joining is mediated through annealing of short direct repeats of microhomology. MMEJ leads to deletions and is frequently associated with chromosomal rearrangements (McVey and Lee, 2008).

DSB repair is further facilitated through chromatin modification by chromatin remodeling complexes, by incorporation of histone variants, and by histone modification (Smeenk and van Attikum, 2013). Histone H3K36 dimethylation has recently been proposed to facilitate NHEJ, where Metnase (SETMAR) directly mediates H3K36 dimethylation near the break site, leading to recruitment and stabilization of NBS1 and Ku70 (Fnu et al., 2011). Histone H3K36 is also trimethylated, which in mammalian cells is performed uniquely by the SETD2/HYPB methyltransferase (Edmunds et al., 2008). H3K36me3 is associated with transcriptional elongation and is found in gene coding regions,

peaking at 3' ends (Edmunds et al., 2008). SETD2-dependent H3K36 trimethylation facilitates a number of processes within the cell, including splicing, repression of intragenic transcripts, and chromatin accessibility (Li et al., 2013; Wagner and Carpenter, 2012). *SETD2* is also mutated in a number of cancer types, including breast, lung, acute lymphoblastic leukemia, clear cell renal cell carcinoma, and glioma, supporting its role as a tumor suppressor (Al Sarakbi et al., 2009; Dalglish et al., 2010; Fontebasso et al., 2013; Newbold and Mokbel, 2010; Zhang et al., 2012). SETD2-dependent H3K36 trimethylation has recently been shown to regulate DNA mismatch repair (Li et al., 2013). However, SETD2-deficient cancers exhibit a wide range of mutations, including insertions, deletions (indels), and chromosomal aberrations (Sato et al., 2013; Zhu et al., 2014), suggesting an additional role for SETD2 in genome stability.

Additionally, H3K36 methylation is regulated by the KDM4/JMJD2 family of histone demethylases. These contain JmjN-JmjC and tandem-Tudor domains that specifically remove the tri- and dimethyl forms of both H3K9 and H3K36, with preference for the trimethyl form being observed in the case of KDM4A/JMJD2A (Couture et al., 2007; Klose et al., 2006; Whetstone et al., 2006). KDM4 family proteins are frequently overexpressed in cancers and are associated with poor patient survival (Berry and Janknecht, 2013; Black et al., 2013).

Here, we investigate the role of SETD2-dependent H3K36me3 in maintaining genome stability. We establish a role for H3K36me3 in HR repair by facilitating resection. In addition, we define a role for SETD2 and RAD51 in maintaining genome stability through suppressing MMEJ at break sites.

## RESULTS

### SETD2 Suppresses Break-Induced Mutations

Tumor suppressors can suppress carcinogenesis by preventing genome instability, a hallmark of cancer. To investigate the impact of loss of SETD2, a tumor suppressor, on genome stability following DSB induction, we developed an I-SceI-induced loss of function assay (HPRT<sup>+</sup>:I-SceI). Intron-encoded endonuclease 1 from *Saccharomyces cerevisiae* (I-SceI) is a rare-cutting endonuclease that has no predicted recognition site in the mammalian genome (Jasin, 1996). An I-SceI recognition sequence was inserted into the endogenous *HPRT* exon 6 in HT1080 (fibrosarcoma) cells. The I-SceI site maintains the *HPRT* reading frame and makes only a single amino acid change that does not impair the function of *HPRT* (Figure 1A). Following I-SceI induction, inaccurate DSB repair generates *HPRT*-negative mutants, which can be selected for using 6-thioguanine (6-TG), and indels can be detected by PCR amplification using primers flanking the break site (Figure 1A). Following small interfering RNA (siRNA) knockdown and I-SceI induction, the frequency of *HPRT* loss (mutation frequency) in SETD2-depleted cells was 1.65%, significantly higher ( $p = 0.0014$ ) than that of nontargeting controls (1.1%). These findings resembled those in RAD51-depleted cells in which the frequency of *HPRT* loss was also significantly increased to 1.88% ( $p = 0.0022$ ) compared to nontargeting controls (Figure 1B). SETD2 and RAD51 codepletion (siS+siR) also significantly increased the mutation frequency to 1.52% ( $p = 0.037$ ), which was similar to the frequency

observed following either SETD2 or RAD51 depletion (Figure 1B). We confirmed that I-SceI protein expression and cleavage efficiency were the same in cells transfected with either control siRNA or SETD2 siRNA (Figures S1A–S1C). In addition, *HPRT* gene transcription was not affected by SETD2 knockdown, as shown by quantitative RT-PCR (qRT-PCR) of spliced and unspliced *HPRT* mRNA (Figures S1D and S1E). Therefore, the mutation frequency in this system is likely to be directly associated with misrepair of the DSB at the I-SceI site.

Further, we studied the mutation patterns across the break site of 30 individually isolated *HPRT*-negative clones from each background by PCR amplification and sequencing. *HPRT*-negative clones from cells treated with nontargeting control siRNA indicated the presence of microdeletions of 2–5 bp, consistent with DSB repair by C-NHEJ. Larger microdeletions were also observed that were associated with regions of microhomology located either side of the break site, consistent with DSB repair through MMEJ (Figures 1C and S1F).

Sequence analysis indicated that SETD2-depleted cells exhibited a significant increase in average deletion length (11 bp,  $p < 0.0001$ ) compared to control cells (5 bp) (Figures 1C and 1D). RAD51-depleted cells exhibited a further significant increase in the average deletion length (22 bp,  $p = 0.014$ ) (Figures 1C and 1D). RAD51 and SETD2 codepletion generated deletion lengths (an average of 8 bp) comparable to those observed following SETD2 knockdown, which in turn was significantly higher than the nontargeting control ( $p = 0.026$ ) (Figures 1C and 1D). Insertions at the *HPRT* break site were also detected. However, the frequency and size of the insertions was not significantly altered between SETD2-depleted cells, SETD2/RAD51 codepleted and nontargeting controls.

We next examined the mechanism for misrepair in cells exhibiting deletions. We found that the frequency of microhomology-mediated end-joining (MMEJ) was significantly increased in SETD2 and RAD51-depleted cells ( $p < 0.05$ ) (Figures 1E and S1G). This suggested that HR-deficient cells use MMEJ as an alternative repair mechanism, which gives rise to a mutation signature of sequence loss between regions of microhomology. These results support a role for SETD2 in tumor suppression by maintaining genome stability through preventing deleterious mutations arising in response to DSBs. These findings further identify a similar break-induced mutation signature between SETD2- and RAD51-depleted cells, suggesting an early role for SETD2 in HR repair.

### SETD2 Is Required for Homologous Recombination Repair

To test the role for SETD2 in DSB repair, we depleted SETD2 in U2OS and HeLa cells using two independent siRNAs and measured the clonogenic survival following exposure to DNA-damaging agents. SETD2 knockdown significantly reduced survival after treatment with mitomycin C (MMC), camptothecin (CPT), or ionizing radiation (IR) in U2OS cells and HeLa cells compared to nontargeting controls (Figures 2A and S2A). These results identify a role for SETD2 in the cellular response to DNA damage and are consistent with a role for SETD2 in DSB repair.

SETD2 knockdown was validated by western blotting (Figure 2B). Western blotting also showed that SETD2 knockdown

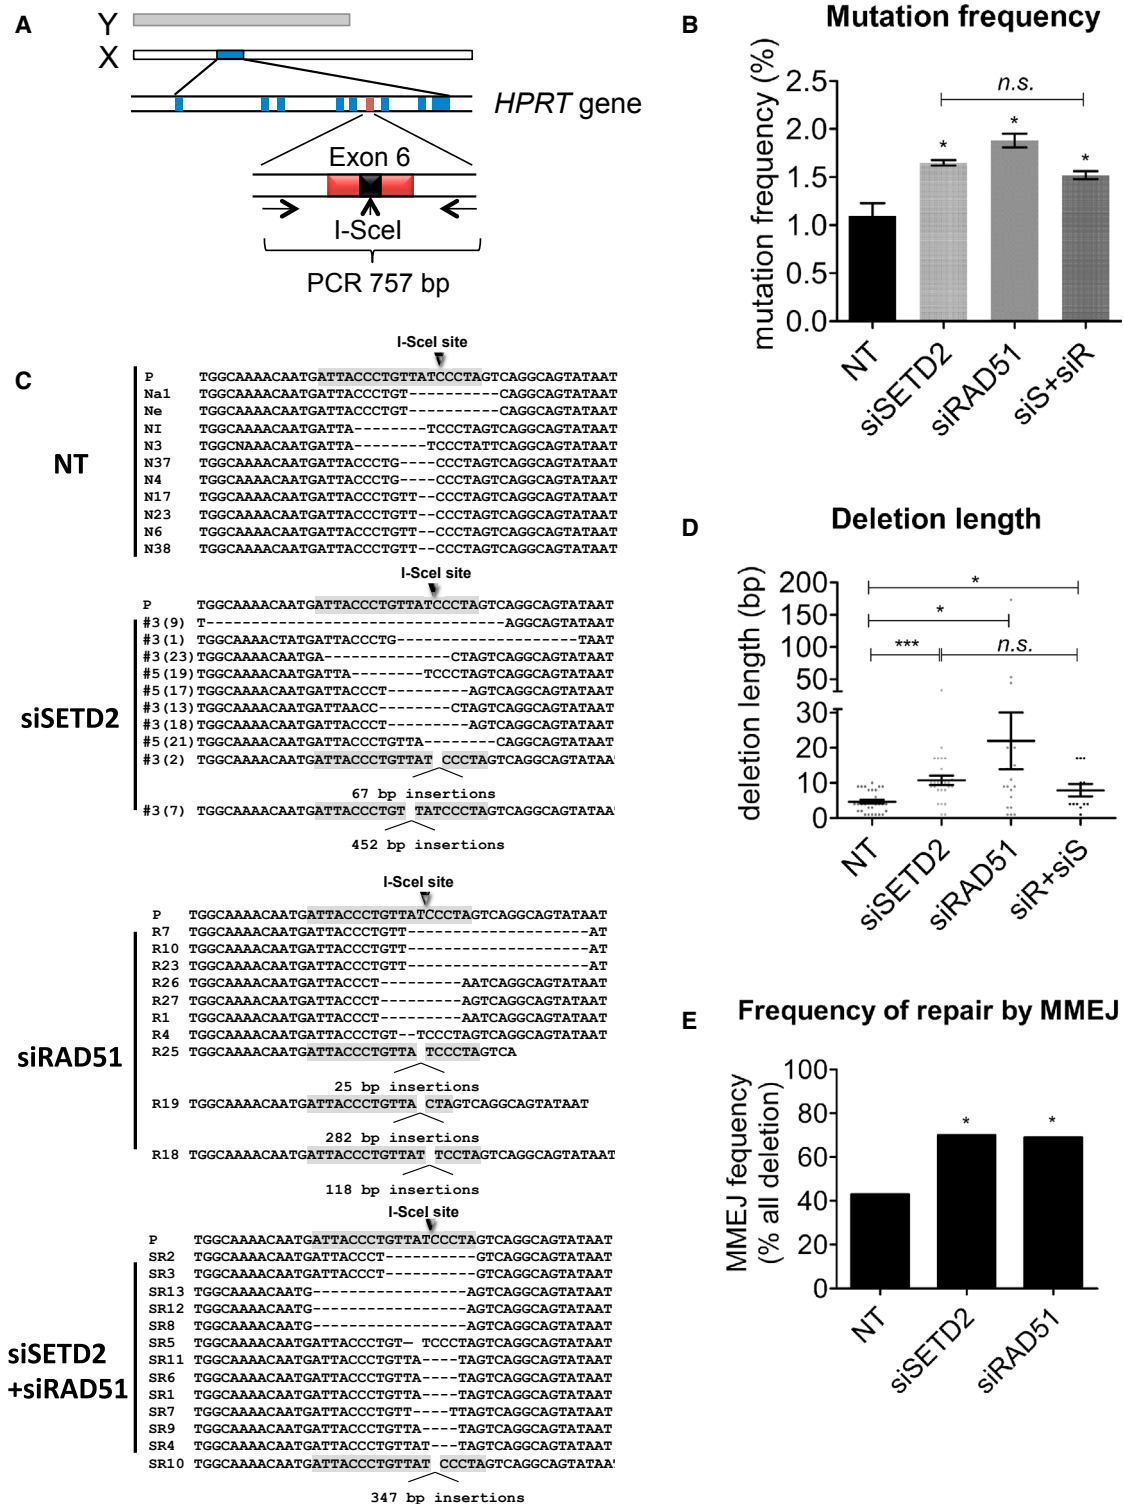

**Figure 1. SETD2- and RAD51-Depleted Cells Exhibit a Common Break-Induced Mutation Signature**

(A) Schematic map of the HPRT<sup>+</sup>-I-SceI assay, where arrows indicate PCR primers used to amplify genomic DNA to allow sequencing across the break site (see Supplemental Experimental Procedures).

(B) Mutation frequency of nontargeting control (NT), SETD2-depleted, RAD51-depleted, and SETD2/RAD51-codepleted cells (siS+siR) after I-SceI induced DSB. Error bars represent SEM and \*p < 0.05; n.s., not significant.

(legend continued on next page)

significantly reduced global levels of H3K36me3, confirming SETD2 as the major H3K36me3 methyltransferase in human cells (Figure 2B). Because RAD51 is more likely to be affected among DNA repair genes by siRNA off-target effects (Adamson et al., 2012), we also confirmed that SETD2 knockdown by siRNA did not affect the RAD51 protein levels (Figure 2B). We confirmed that SETD2 knockdown had no effect on the expression of major HR proteins, including BRCA2, RAD50, CtIP, MRE11, and RPA and the NHEJ protein KU80 (Figure S2B). We also observed no changes to the cell cycle after SETD2 knockdown (Figure S2C).

Both MMC and CPT induce S phase-specific DSBs, which are predominantly repaired by HR (Arnaudeau et al., 2001; Moynahan et al., 2001). To test a possible role for SETD2 in HR repair, we used a well-characterized GFP-based reporter for HR (DR-GFP). The HR reporter contains an I-SceI recognition sequence, which upon I-SceI expression is cleaved to generate a DSB. DSB repair by HR using a direct repeat within the reporter cassette as a template results in an intact GFP gene (Figure 2C) (Pierce et al., 1999). SETD2 knockdown by two independent siRNAs significantly reduced HR repair of an I-SceI induced DSB by 67%–77% compared to nontargeting control cells ( $p < 0.0003$ ) (Figure 2D). As a control for the HR reporter, knockdown of RAD51 reduced HR activity by 97% ( $p < 0.0001$ ), whereas DNA-PKcs inhibitor NU7441 had no effect on HR (Figure 2D). In contrast, SETD2 knockdown had no effect on repair of an I-SceI induced DSB in an NHEJ reporter (IRES-TK-EGFP) in which joining of two I-SceI sites separated by a thymidine kinase gene (TK) results in GFP expression (Figures 2E and 2F) (Ogiwara et al., 2011). As a control, RAD51 had no effect on the same NHEJ reporter, whereas the DNA-PK inhibitor NU7441 reduced NHEJ activity by 98% ( $p < 0.0001$ ) (Figure 2F). These results identify a role for SETD2 in HR repair.

### An Early Role for SETD2 in Homologous Recombination

To further investigate the role of SETD2 in DSB repair, we examined the rate of repair following IR. We used  $\gamma$ H2AX foci as a marker of DNA damage and found that following exposure to 5 Gy IR, SETD2 knockdown significantly delayed removal of  $\gamma$ H2AX foci at 48 hr ( $p < 0.003$ ) compared to nontargeting controls, supporting a role for SETD2 in efficient DSB repair (Figure 3A). We next investigated the effect of SETD2 depletion on the recruitment of HR repair proteins following DNA damage. SETD2 knockdown resulted in significantly reduced RAD51 foci formation 4 and 8 hr after exposure to IR compared to nontargeting controls ( $p < 0.0013$ ) (Figure 3B). SETD2 knockdown also significantly reduced RAD51 foci formation after exposure to CPT ( $p < 0.05$ ) (Figure S2D).

We also examined the effect of SETD2 depletion on RPA recruitment, where we induced DSBs in S phase cells using CPT or MMC. A significant reduction in RPA foci formation was

observed after CPT or MMC treatment following SETD2 knockdown compared to nontargeting controls ( $p < 0.023$ ) (Figures 3C and S2E). SETD2 knockdown leads to reduced H3K36me3 in the nuclei as confirmed by costaining the cells with antibodies against H3K36me3 and RPA (Figure S2F). Together, these findings support a role for SETD2 in promoting HR through facilitating recruitment of RPA and RAD51 to DNA damage sites.

To further confirm the impact of SETD2 loss on the recruitment of HR factors to the site of DSBs, we performed chromatin immunoprecipitation (ChIP) near the I-SceI site in the DR-GFP cassette (Figure S3A). The I-SceI site is located within the DR-GFP cassette under the control of the highly active CMV promoter, and thus H3K36me3, which is associated with active transcription, is predicted to be present throughout the cassette. After induction of DSBs by I-SceI, no change in H3K36me3 or SETD2 levels was detected proximal or distal to the break site after 8, 24, or 48 hr following I-SceI transfection (Figure S3B). The results were also quantified by ChIP-qPCR (Figure S3C). Although other groups also observed no changes to H3K36me3 level after DSB, globally (Fnu et al., 2011) or locally at the break site (Pei et al., 2011; Aymard et al., 2014), we were surprised by the lack of reduction in H3K36me3 or SETD2 knowing that regional transcriptional silencing has been observed at sites of DSBs (Shanbhag et al., 2010). We speculate that the unexpected maintenance of H3K36me3 at the DSB site by SETD2 may serve as an anchor to mediate HR repair.

We monitored recruitment of major HR factors to the DSB site in the ChIP system. RPA and RAD51 were recruited to the DSB site, resulting in increased binding to the “up” site 18 hr after I-SceI transfection, compared to uncut controls (Figure 3D). SETD2 depletion substantially reduced the recruitment of RPA and RAD51 after the I-SceI cut (Figure 3D). SETD2 protein depletion was validated by western blotting (Figure S3D), and was further confirmed by the absence of SETD2 or H3K36me3 at the break site (Figure 3D). These findings are consistent with the RPA and RAD51 foci data, indicating that SETD2 is required to recruit RPA and RAD51 to DSB sites. Together, these findings confirm a presynaptic role for SETD2 in facilitating HR repair of DSBs.

### H3K36me3 Is Required for Homologous Recombination Repair

To investigate if the methyltransferase activity of SETD2 is required for its role in HR, we generated two doxycycline-inducible U2OS cell lines, where either a wild-type *SETD2* cDNA or a methyltransferase-dead *SETD2* cDNA was inserted behind a Tet operator in the genome of U2OS cells. Upon addition of doxycycline to the cell culture medium, the Tet operator was derepressed and the wild-type or mutant SETD2 was expressed. Both cDNA constructs were mutated so that they are refractory to SETD2 siRNA#3. The methyltransferase-dead SETD2 was

(C) Representative sequence alignments of the above-mentioned PCR products in nontargeting control (NT), SETD2-depleted, RAD51-depleted, and SETD2/RAD51-codepleted backgrounds, respectively.

(D) Average length of deletions (bp) in different backgrounds, where each dot represents an independent clone. The lines represent mean and SEM, \* $p < 0.05$ , \*\*\* $p < 0.001$ .

(E) Frequency of repair by MMEJ in deletion mutants isolated from different backgrounds.  $p$  values calculated by statistical analysis “difference between proportions,” \* $p < 0.05$ . See also Figure S1.

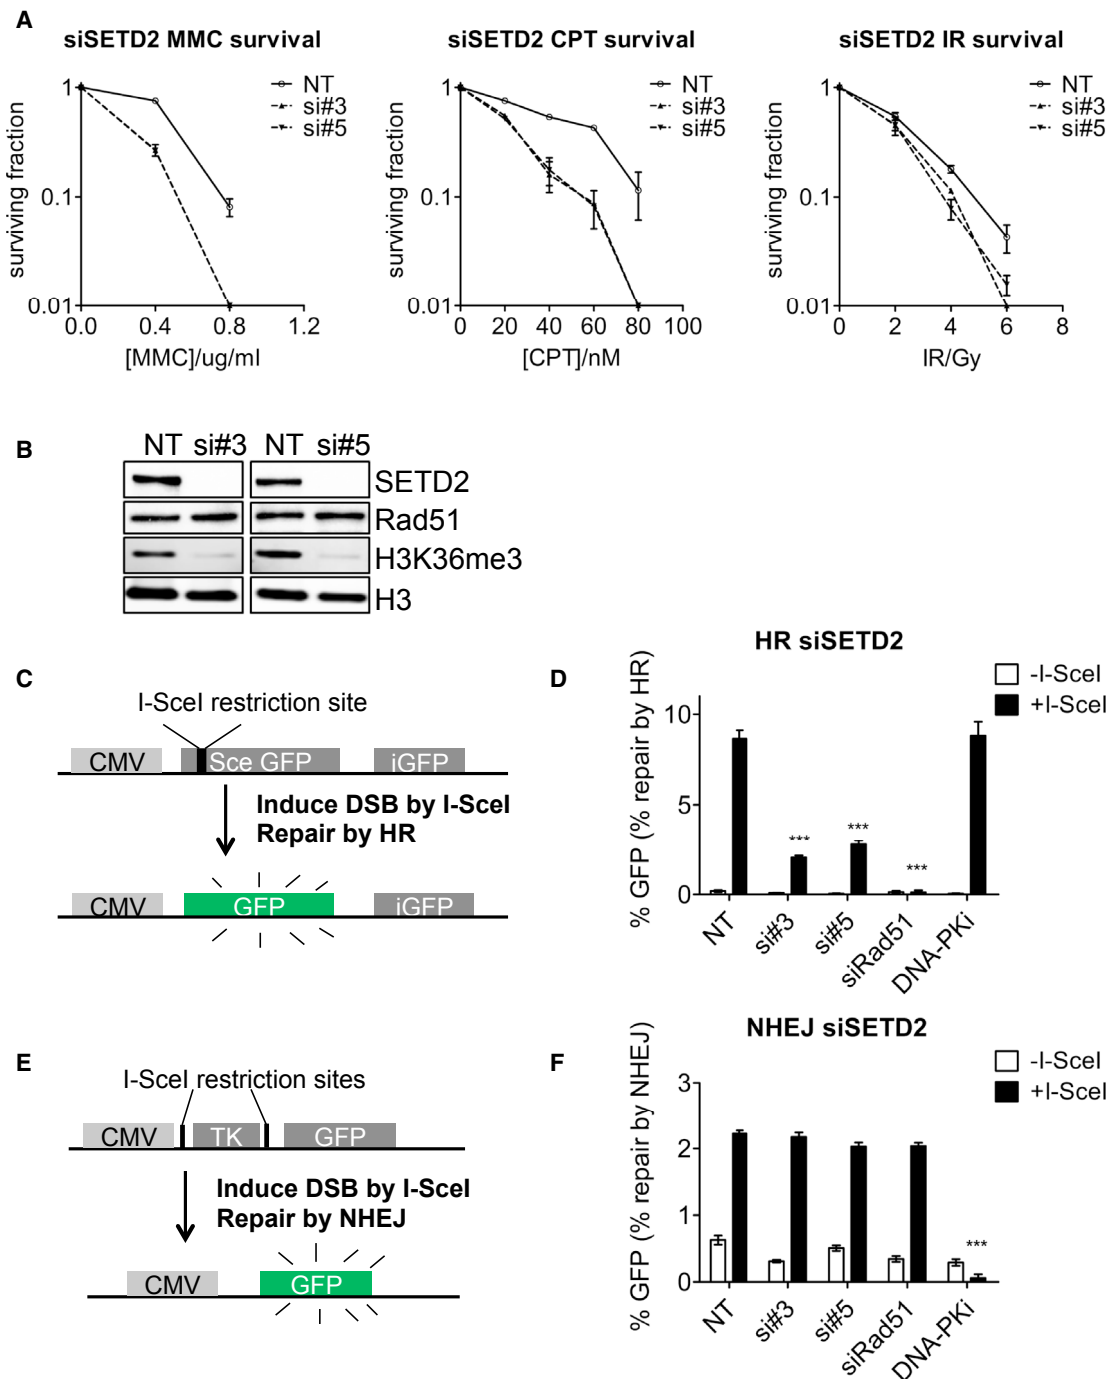

**Figure 2. SETD2 Is Required for Homologous Recombination**

(A) Clonogenic survival of SETD2 knockdown (si#3 and si#5) or nontargeting control (NT) U2OS cells treated with indicated concentrations of MMC, CPT, and IR. Error bars show SEM from three independent experiments.

(B) Western blots showing levels of SETD2, RAD51, and H3K36me3 72 hr after siRNA transfection.

(C) Schematic map of the DR-GFP cassette for assessing HR efficacy.

(D) HR repair efficacy of reporter cells treated with nontargeting control siRNA (NT), SETD2 siRNAs (si#3 and si#5), RAD51 siRNA (siRad51), or DNA-PK inhibitor NU7441 (Axon), indicated by the percentage of GFP-positive cells. Error bars show SEM from three independent experiments. \*\*\* $p < 0.001$ .

(E) Schematic map of the NHEJ cassette.

(F) NHEJ repair efficacy of reporter cells treated with nontargeting control siRNA (NT), SETD2 siRNAs (si#3 and si#5), RAD51 siRNA (siRad51), or DNA-PK inhibitor NU7441, indicated by the percentage of GFP-positive cells. Error bars show SEM from three independent experiments. \*\*\* $p < 0.001$ . See also Figure S2.



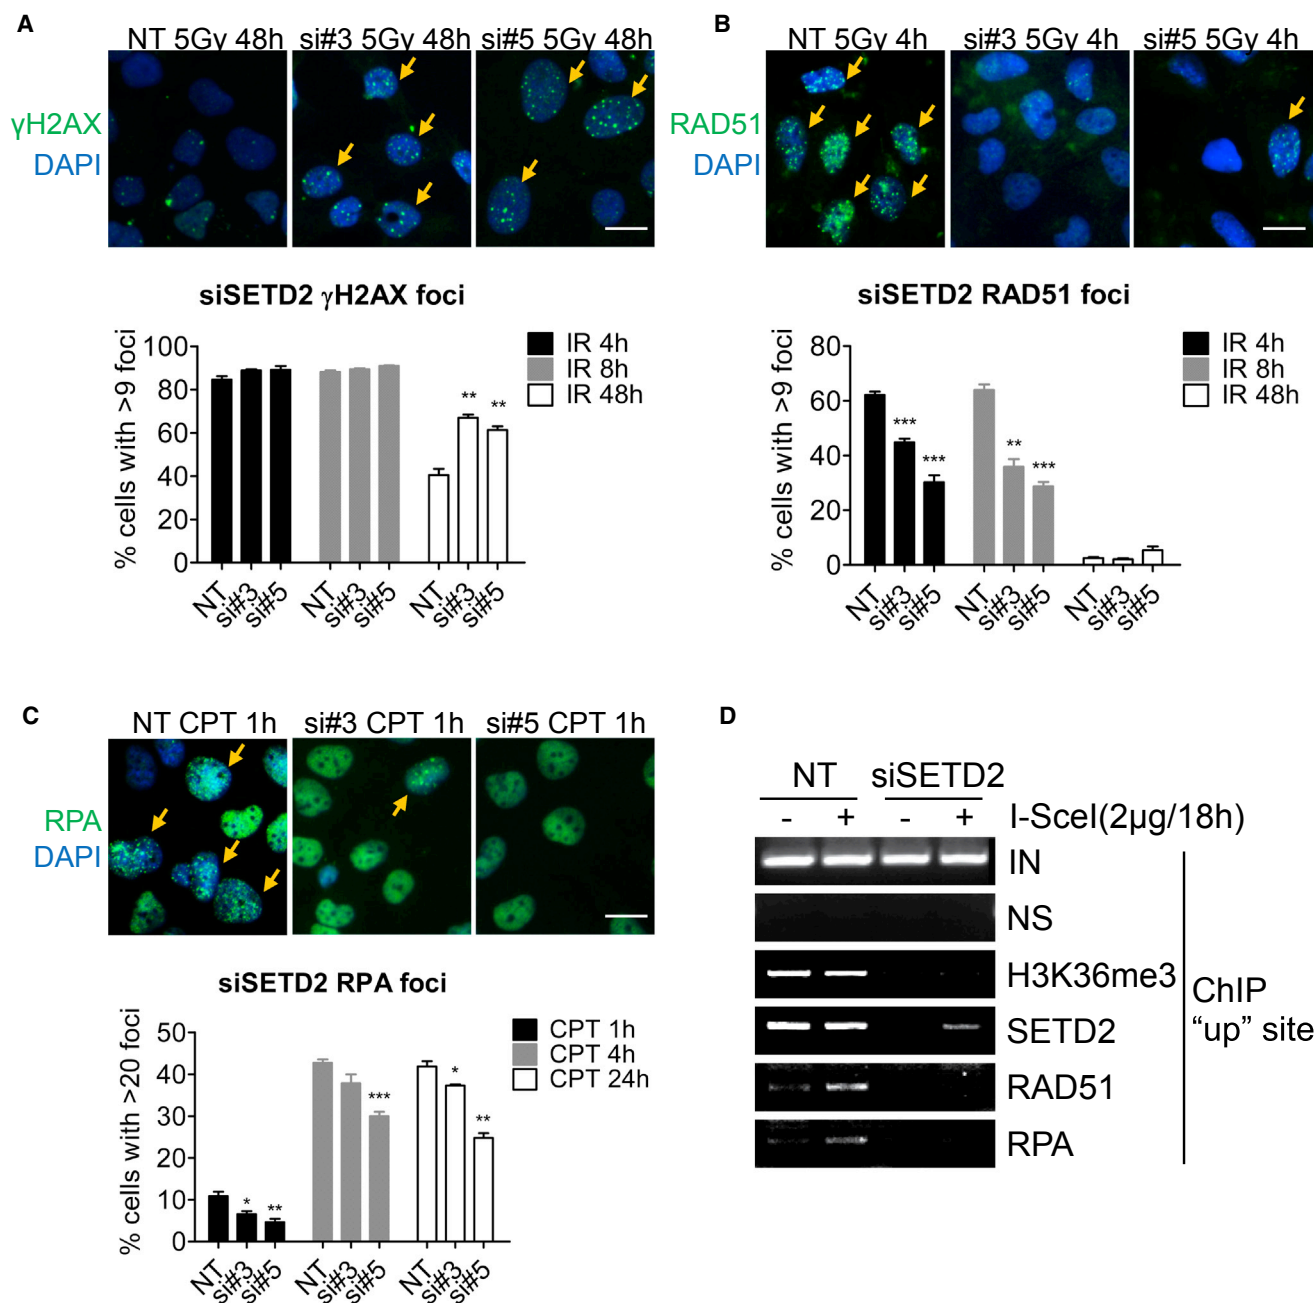

**Figure 3. SETD2 Is Required for the Recruitment of RPA and RAD51**

(A and B)  $\gamma$ H2AX (A) or RAD51 (B) foci formation at indicated times after IR (5 Gy) in U2OS cells treated with nontargeting control siRNA (NT) or SETD2 siRNAs (si#3 and si#5). Error bars represent SEM from three independent experiments.

(C) RPA32 foci formation at indicated times after treatment with CPT (10  $\mu$ M) in U2OS cells transfected with control siRNA (NT) or SETD2 siRNAs (si#3 and si#5). Representative fluorescent images are shown; scale bar, 20  $\mu$ m. For each condition, 45 fields and at least 500 cells were examined by InCell (GE Healthcare). Error bars show SEM from three independent experiments. \*\*\* $p$  < 0.001, \*\* $p$  < 0.01, \* $p$  < 0.05.

(D) ChIP analysis on DR-GFP U2OS cells transfected with nontargeting control (NT) or SETD2 siRNA for 72 hr, followed by transfection of either vector or I-SceI plasmid for a further 18 hr, as indicated. ChIP on the "up" DNA site of the DR-GFP cassette was performed on the lysate using antibodies against nonspecific Ig (NS), H3K36me3 (Abcam), SETD2 (Abcam), RAD51 (Santa Cruz Biotechnology), or RPA (Millipore); inputs (IN) are also indicated.

See also Figures S2 and S3.

mutated at two amino acid residues located within the catalytic site of the SET domain, which are conserved with yeast Set2. The corresponding mutations in yeast were shown to abolish

the methyltransferase activity (Rea et al., 2000; Strahl et al., 2002) (Figure 4A). Both arginine (R) and cysteine (C) residues were mutated in the methyltransferase-dead (MD) cDNA by

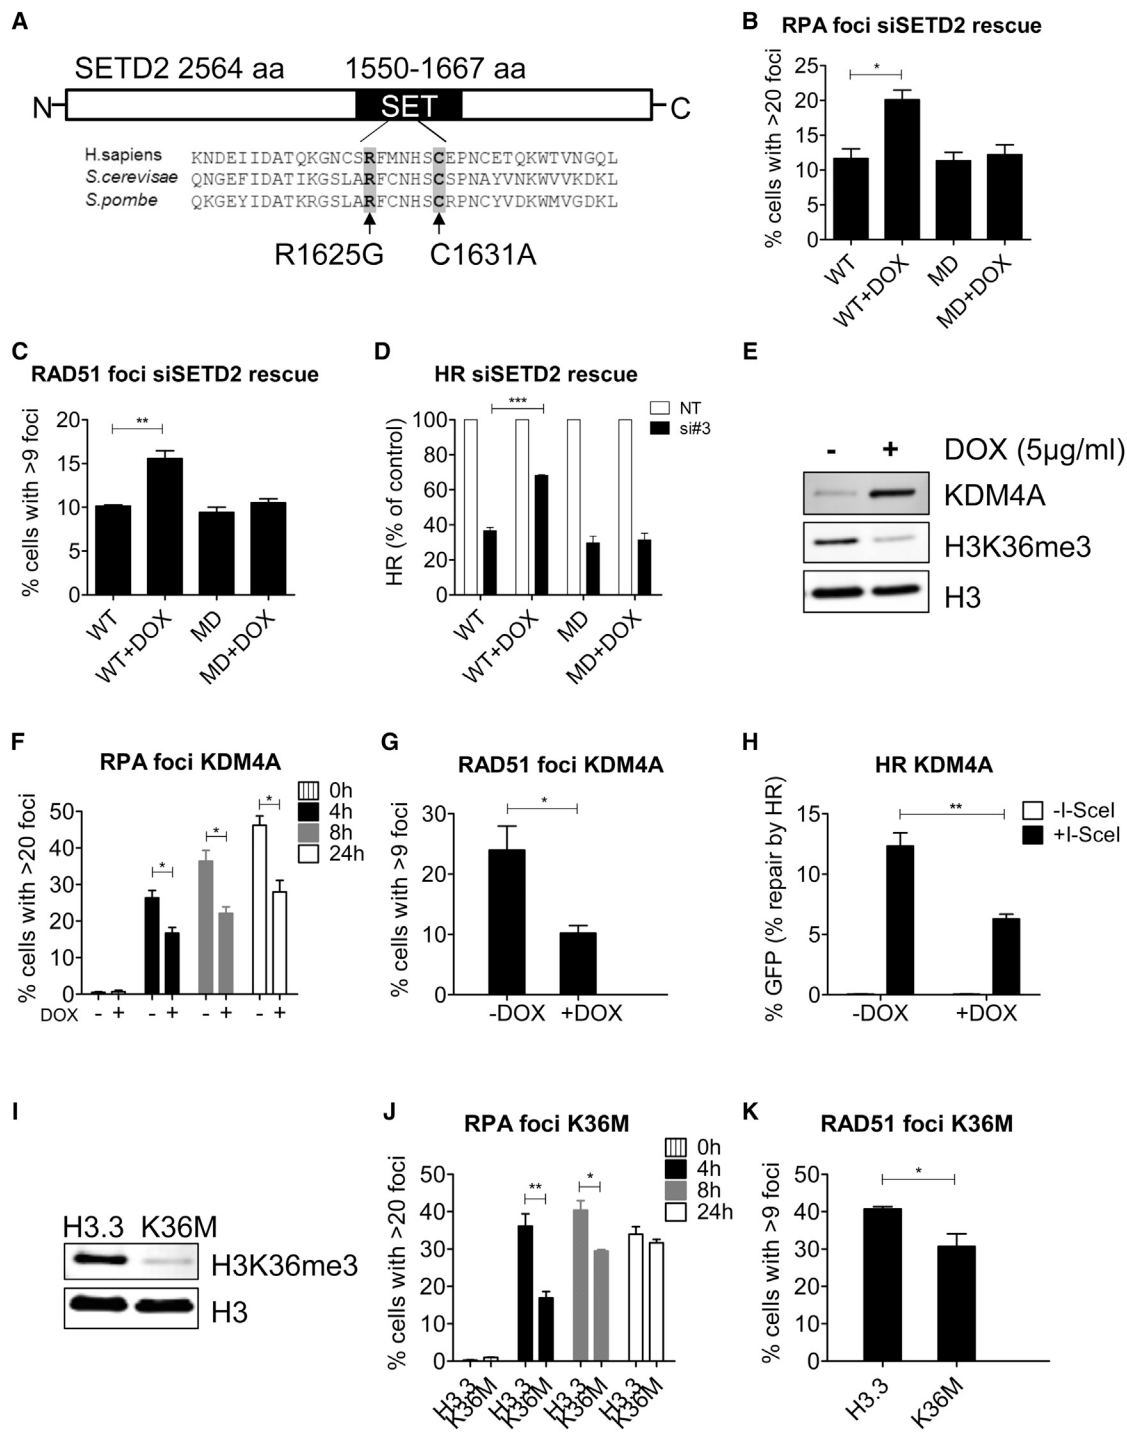

**Figure 4. H3K36me3 Is Required for Efficient HR Repair**

(A) Schematic map showing site-directed mutagenesis for abolishing the methyltransferase activity of SETD2, with both R and C residues mutated simultaneously. Sequence alignment of human SETD2 and *Saccharomyces cerevisiae* Set2 and *Schizosaccharomyces pombe* Set2 amino acid sequences reveals evolutionarily conserved residues that reside in the SET domain.

(B) RPA32 foci formation at 2 hr after treatment with CPT (10 µM) in cells transfected with SETD2 siRNA. WT: T-REx U2OS clone (see [Experimental Procedures](#)) with wild-type SETD2 cDNA integrated but not expressing exogenous SETD2. WT+DOX: the same WT clone expressing exogenous wild-type SETD2. MD: T-REx U2OS clone with methyltransferase-dead mutant SETD2 cDNA integrated but not expressing exogenous SETD2. MD+DOX: the same MD clone expressing exogenous mutant SETD2. Error bars show SEM from three independent experiments, \*p < 0.05.

(legend continued on next page)

site-directed mutagenesis (see [Supplemental Experimental Procedures](#)). Western blot analysis confirmed that doxycycline-induced expression of wild-type SETD2 could restore the level of H3K36me3 after siSETD2 treatment, whereas expression of methyltransferase-dead SETD2 could not restore the level of H3K36me3 ([Figure S4A](#)).

We depleted endogenous SETD2 with siRNA#3 and examined the rescue of the phenotype by the two constructs. Although the wild-type construct increased foci formation of RPA and RAD51 after DNA damage in siSETD2 cells, the methyltransferase-dead mutant did not ([Figures 4B and 4C](#)). This is consistent with the observation that the wild-type construct partially restored HR efficiency whereas the methyltransferase-dead (MD) mutant did not ([Figure 4D](#)). Five to six clones containing each construct were independently isolated and tested. All WT clones were able to restore HR efficiency, but none of the MD clones showed rescue ([Figures S4B and S4C](#)).

The observation that the methyltransferase-dead SETD2 mutant could not rescue HR efficiency suggested that H3K36me3 is required for efficient HR. To test this further, we used SETD2-independent approaches to disrupt H3K36me3 levels. First, we overexpressed KDM4A, an oncogene and a demethylase specific for tri- and dimethylated histone H3K36 and H3K9, predicting that overexpression of KDM4A would reduce the level of H3K36me3 and thus impair HR. Therefore, a doxycycline-inducible KDM4A-expression U2OS cell line was generated. Upon addition of doxycycline, KDM4A was overexpressed, which led to a global reduction in H3K36me3 levels ([Figure 4E](#)). We then compared the recruitment of the HR factors in this cell line with or without KDM4A overexpression. We found that KDM4A overexpression inhibited the formation of RPA and RAD51 foci after DNA damage ([Figures 4F and 4G](#)). Accordingly, KDM4A overexpression also reduced HR efficiency as assessed by the HR reporter ( $p = 0.0078$ ) ([Figure 4H](#)). Using the same cell line without *KDM4A* cDNA integration, we found that doxycycline itself had no effect on HR efficiency of U2OS cells ([Figure S4D](#)). These findings indicate that overexpression of the oncogene KDM4A significantly reduces levels of H3K36me3 and HR.

Second, we utilized a dominant-negative mutation in the histone *H3.3* gene (*H3.3K36M*) that was recently shown to reduce

H3K36me3 specifically without affecting other histone methylations ([Lewis et al., 2013](#)). Accordingly, in cells expressing the mutant *H3.3K36M* transgene, global levels of H3K36me3 were depleted compared to the wild-type H3.3 control ([Figure 4I](#)). Cells expressing H3.3K36M also exhibited delayed RPA and RAD51 foci formation following DNA damage ([Figures 4J and 4K](#)), consistent with similar delays seen in KDM4A overexpressing cells or SETD2-depleted cells. Neither KDM4A overexpression nor H3.3K36M expression affected cell cycle progression as assessed by BrdU incorporation ([Figures S4E and S4F](#)), thus excluding the possibility that the reduction in RPA, RAD51 foci formation and HR efficacy was due to cell cycle effects. The common feature of all three different systems (SETD2 knockdown and rescue, KDM4A overexpression, and H3.3K36M expression) was the reduction in the recruitment of HR proteins and HR efficiency associated with reduced H3K36me3. Together these findings confirm a role for H3K36me3 in HR.

### SETD2 Promotes DSB End Resection

Lens epithelium-derived growth factor p75 (LEDGF) binds to H3K36me3 constitutively through its PWWP domain. Upon DNA damage LEDGF recruits CtIP, which facilitates the resection step during HR repair ([Daugaard et al., 2012](#)). Accordingly, we were able to coprecipitate LEDGF and H3K36me3, independently of DNA damage in U2OS cells ([Figure 5A](#)). LEDGF binding to chromatin was reduced upon SETD2 depletion, consistent with preferential binding of LEDGF to H3K36me3 ([Eidahl et al., 2013](#)), and was DSB independent ([Figure 5B](#)). We predicted that the reduced LEDGF binding following SETD2 depletion would reduce recruitment of CtIP upon damage. We therefore used micro-irradiation to induce localized DSBs and studied the recruitment of CtIP using a U2OS cell line expressing GFP-tagged CtIP ([Sartori et al., 2007](#)). We found CtIP to be localized to sites of DNA damage marked by  $\gamma$ H2AX ([Figure 5C](#)). In contrast, SETD2 knockdown resulted in reduced recruitment of CtIP to the DNA damage site as marked by  $\gamma$ H2AX ([Figure 5C](#)). If SETD2 facilitates HR through LEDGF binding and CtIP recruitment, we would expect SETD2 to be epistatic with CtIP. Indeed, codepletion of SETD2 and CtIP (siC+siS) showed the same level of reduction in HR as CtIP-depletion alone ([Figures 5D and S5A](#)).

(C) RAD51 foci formation at 4 hr after IR (5 Gy) in cells transfected with SETD2 siRNA. The clones used are the same as in (B). Error bars show SEM from three independent experiments, \*\* $p < 0.01$ .

(D) HR efficacy in cells transfected with NT or SETD2 siRNA. The clones used are the same as in (B); error bars show SEM from three independent experiments, \*\*\* $p < 0.001$ .

(E) Western blot showing levels of KDM4A, H3K36me3 and H3 following KDM4A induction with 5  $\mu$ g/ml doxycycline (DOX) for 72 hr in the KDM4A T-REx U2OS cells (see [Experimental Procedures](#)).

(F) RPA32 foci formation at indicated time after 2 hr CPT (10  $\mu$ M) treatment in KDM4A T-REx cells treated with or without 5  $\mu$ g/ml doxycycline (DOX). Error bars show SEM from three independent experiments, \* $p < 0.05$ .

(G) RAD51 foci formation 8 hr after IR (5 Gy) in KDM4A T-REx cells treated with or without 5  $\mu$ g/ml doxycycline (DOX). Error bars show SEM from three independent experiments. \* $p < 0.05$ .

(H) HR repair efficacy in KDM4A T-REx DR-GFP U2OS cells treated with or without 5  $\mu$ g/ml doxycycline (DOX). Error bars show SEM for three independent experiments. \*\* $p < 0.01$ .

(I) Western blot showing levels of H3K36me3 and H3 in U2OS cells with stably integrated *H3.3* (control) or *H3.3K36M* lentiviral construct (see [Supplemental Experimental Procedures](#)).

(J) RPA32 foci formation at indicated time after 2 hr CPT (10  $\mu$ M) treatment in H3.3 or H3.3K36M stable expression cells. Error bars show SEM from three independent experiments.

(K) RAD51 foci formation 8 hr after IR (5 Gy) in H3.3 or H3.3K36M stable expression cells. Error bars show SEM for three independent experiments, \* $p < 0.05$ . See also [Figure S4](#).



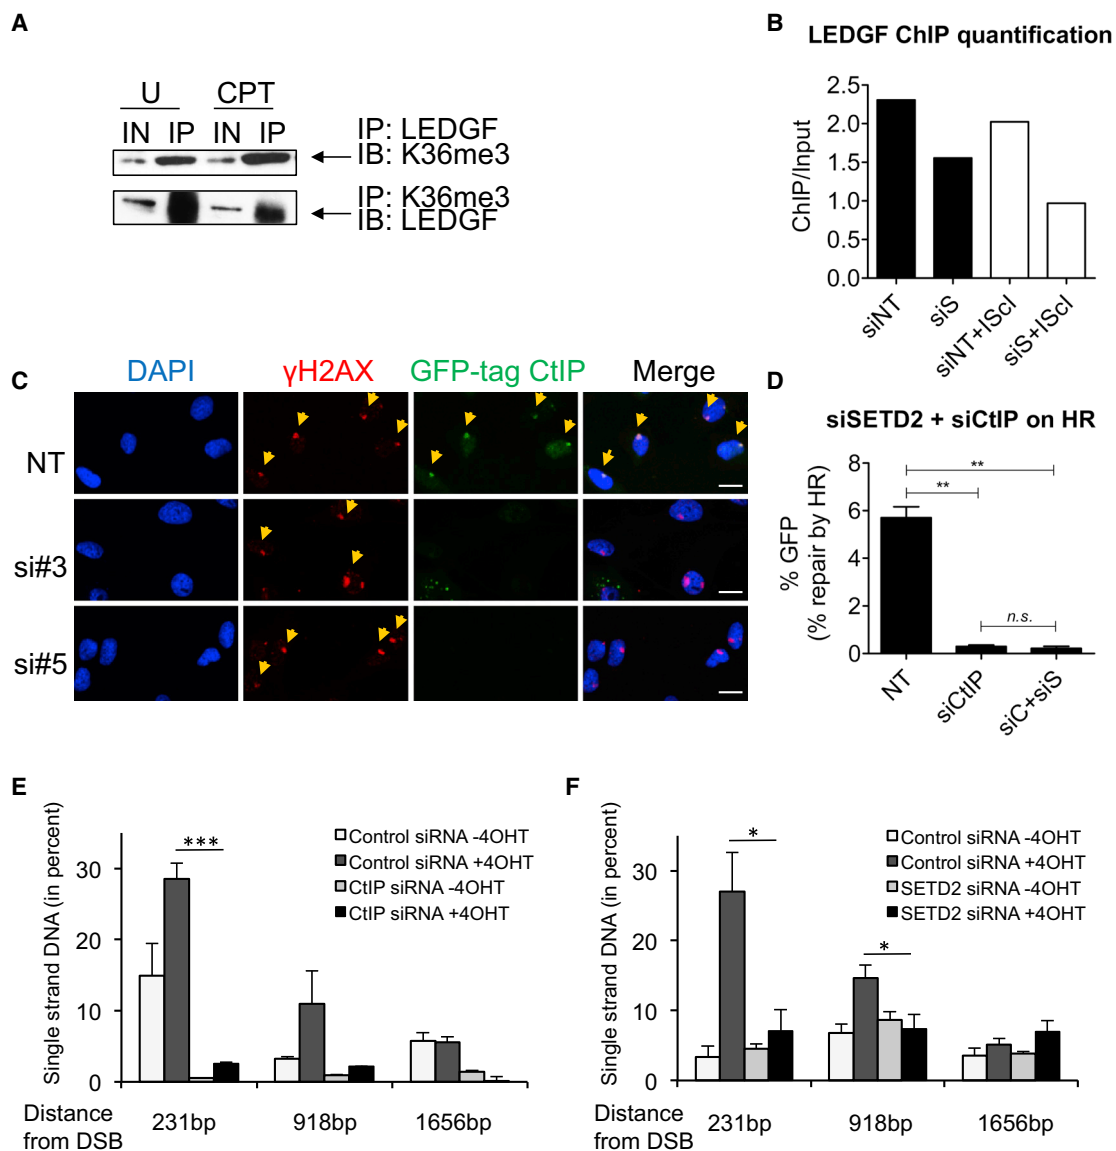

**Figure 5. SETD2 Promotes HR through LEDGF/CtIP-Facilitated Resection**

(A) Coimmunoprecipitation of LEDGF and H3K36me3 in the presence or absence of DNA damage. U2OS cells were left untreated (U) or treated with CPT (15 μM for 4 hr). Reciprocal co-IPs are shown.

(B) ChIP analysis of LEDGF binding to the DSB site before and after I-SceI induction in NT or SETD2 knockdown DR-GFP cells. siNT, control siRNA-treated cells before cut; siS, SETD2 siRNA-treated cells before cut; siNT+IScl, control siRNA-treated cells after cut; siS+IScl: SETD2 siRNA-treated cells after cut. Numbers were quantified from one ChIP-PCR experiment and show LEDGF-ChIP over input.

(C) Microirradiation showing CtIP recruitment to the damage site in U2OS cells treated with nontargeting control siRNA (NT) or SETD2 siRNAs (si#3 and si#5). Fluorescent images were acquired using a confocal microscope (Zeiss); scale bars, 20 μm.

(D) HR efficacy (as measured by GFP reporter assay as in Figure 2D) in cells transfected with control siRNA (NT) or CtIP siRNA (siCtIP) or both CtIP and SETD2 siRNA (siC+siS). Error bars show SEM from three independent experiments, \*\*p < 0.01, n.s. not significant.

(E) CtIP depletion impedes resection at an AsiSI induced DSB. DNA was extracted from 4OHT-treated or untreated D1Va cells, transfected with control or CtIP siRNA, as indicated. Resection was analyzed, using a protocol detailed in Zhou et al. (2014), at an AsiSI-induced DSB reported to be repaired by a RAD51-dependent pathway (DSB-II in Aymard et al., 2014). The mean and SEM (n = 4, technical replicate) of a representative experiment are presented.

(F) SETD2 depletion impedes resection at an AsiSI induced DSB. DNA was extracted from 4OHT-treated or untreated D1Va cells, transfected with control or SETD2 siRNA, as indicated. Same as in (E) except that cells were transfected with a siRNA directed against SETD2. The mean and SEM (n = 4, technical replicate) of a representative experiment are presented. See also Figure S5.

These findings are consistent with the hypothesis that SETD2-dependent H3K36me3 promotes recruitment of CtIP by LEDGF to break sites.

Reduced CtIP recruitment, together with the reduced RPA foci formation following SETD2 depletion, suggested that SETD2-dependent H3K36 trimethylation might promote DSB resection.

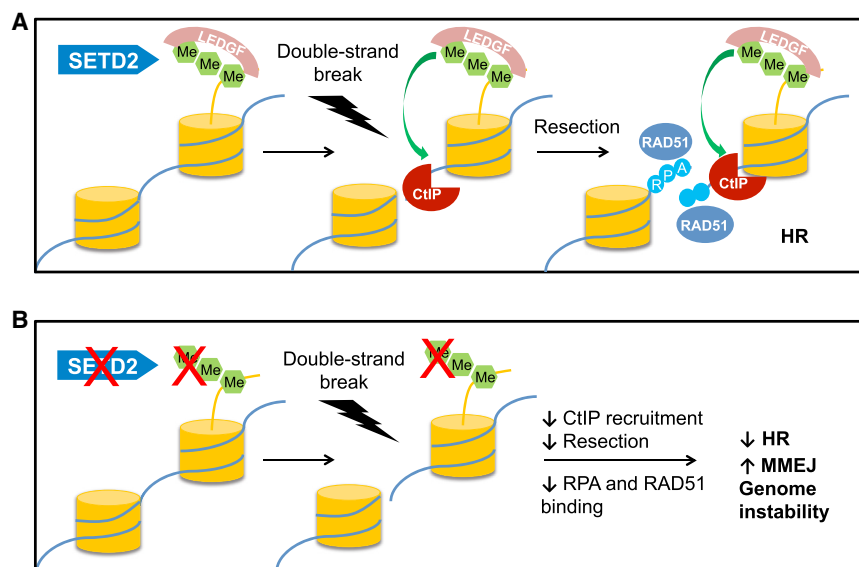

**Figure 6. Model for the Role of SETD2-Dependent H3K36me3 in HR and Genome Stability**

(A) SETD2-dependent H3K36 trimethylation constitutively recruits LEDGF to chromatin. Following DNA double-strand break, LEDGF recruits CtIP, thereby promoting resection, facilitating RPA and RAD51 recruitment.

(B) In the absence of H3K36 trimethylation, lack of LEDGF chromatin association results in reduced recruitment of CtIP after double-strand breaks, impairing resection and HR, leading to elevated levels of MMEJ and genome instability.

the possibility that other H3K36me3 binding factors may also contribute to efficient HR.

The involvement of H3K36me3 in HR raises the question as to whether this histone mark is DSB inducible or preset to determine the choice of repair pathways.

To directly measure resection, we used an *in vivo* resection assay (Zhou et al., 2014) in which levels of ssDNA were assessed at increasing distances from a specific DSB induced by the AsiSI restriction enzyme, which was found to recruit RAD51 (Iacovoni et al., 2010; Aymard et al., 2014). Following DSB induction (+4OHT), ssDNA was readily detected 231 bp from the AsiSI break site (DSB-II in Aymard et al., 2014) and at reduced levels further from the break site. Following CtIP depletion, ssDNA levels were significantly reduced at 231 bp ( $p = 2.2 \times 10^{-5}$ ) and 918 bp ( $p = 0.057$ ) from the break site compared to control siRNAs (Figure 5E). Following SETD2 depletion, ssDNA levels were also significantly reduced at 231 bp ( $p = 0.021$ ) and 918 bp ( $p = 0.037$ ) from the break site compared to control siRNAs (Figure 5F), and SETD2 depletion did not affect DSB induction at this site as assayed by XRCC4 ChIP (Figure S5B), thus confirming a role for SETD2 in facilitating DSB resection.

## DISCUSSION

The *SETD2* gene encoding the H3K36 trimethyltransferase is among the most mutated in human cancers (Lawrence et al., 2014). Yet, how SETD2 functions to suppress the genome instability frequently observed in SETD2-deficient cancer cells is unknown (Sato et al., 2013; Zhu et al., 2014). Here, we describe a role for SETD2-dependent H3K36 trimethylation in facilitating error-free DSB repair and genome stability through efficient HR. Our data support a model in which LEDGF is constitutively anchored to H3K36me3-decorated chromatin through its PWWP domain. Upon DNA damage, chromatin-bound LEDGF recruits CtIP, which promotes resection—an essential step in HR repair (Figure 6A). In the absence of SETD2-dependent H3K36me3, the chromatin association of LEDGF is compromised, and DNA damage-induced CtIP recruitment is impaired, leading to reduced resection and HR and an increase in error-prone MMEJ and subsequent genome instability (Figure 6B). Our data do not, however, exclude

We did not detect any appreciable increase in H3K36me3 levels at the break site following I-SceI induction. These findings are consistent with previous observations indicating that H3K36me3 levels do not change following DNA damage, either globally (Fnu et al., 2011) or locally (Aymard et al., 2014; Pei et al., 2011). Given that SETD2-dependent H3K36 trimethylation strongly correlates with actively transcribed regions of the genome (Edmunds et al., 2008; Yoh et al., 2008), our findings thus support a spatial link between HR and transcriptionally active, H3K36me3 decorated regions of the genome. Indeed, because HR repair is usually error free, this would be expected to protect genome integrity following DSB induction or replication fork collapse at such sites, which would be important in maintaining cell homeostasis.

Genome-wide sequencing has suggested certain mutation signatures are associated with specific cancer types (Alexandrov et al., 2013) but lacks the power to identify driver mutations that give rise to that mutation signature. Here, we use a system to determine the impact of individual gene dysfunction on mutation patterns arising during the repair of a single DSB. We show that, by depleting SETD2 or RAD51 HR proteins, DSB induction leads to significantly increased mutation frequencies associated with deletions within six cell cycles (5 days). These findings identify a role for SETD2, like RAD51, in suppressing break-induced mutations. Further mechanistic analysis indicated that deletions arising from SETD2 or RAD51 depletion resulted from a significant increase in error-prone MMEJ. We propose that MMEJ arises from failed HR. SETD2 loss results in partial resection, short ssDNA 3' ends and reduced RPA foci. These partially resected ends are insufficient to promote efficient HR and are no longer substrates for C-NHEJ. Instead, these partially resected ends become substrates for MMEJ. Similarly, following RAD51 depletion, whereas resection proceeds normally, HR is blocked presynaptically, resulting in the accumulation of longer unrepaired resected ends. Such ends are no longer substrates for C-NHEJ, and, because HR cannot proceed, the ends are instead

rejoined by MMEJ. Extensive resection following RAD51 loss facilitates annealing between regions of microhomology further from the break site, thus leading to larger deletions than those observed for SETD2. The observations that HR was significantly reduced whereas C-NHEJ was unchanged following SETD2 or RAD51 depletion are consistent with this model. Together, these findings suggest a role for HR in maintaining genome stability through suppression of MMEJ. This “real-time” mutation study can therefore provide important insights into how loss of these genes contributes to somatic mutation and intratumor heterogeneity, and it highlights the importance of HR repair genes in maintaining genome stability.

SETD2 is a tumor suppressor and its loss is an important step in the progression of a number of cancer types (Dagliesh et al., 2010; Fontebasso et al., 2013; Gerlinger et al., 2012). Our findings provide mechanistic insights into how SETD2 functions as a tumor suppressor. Moreover, all three Tudor domain-containing KDM4/JMJD2 proteins (A, B, and C) are frequently overexpressed in various cancers, including breast, colorectal, lung, and prostate (Berry and Janknecht, 2013). Our findings predict that overexpression of these KDM4 family members causes genome instability and tumorigenesis through loss of H3K36me3-mediated HR repair. The identification of a role for H3K36me3 in facilitating HR repair, in addition to its recently described role in mismatch repair (Li et al., 2013), establishes the H3K36me3 chromatin mark as an important functional node for maintaining genome stability.

## EXPERIMENTAL PROCEDURES

### I-SceI-Inducible HPRT Mutation Assay

The reporter HT1080 cell line with a functional but I-SceI-cleavable *HPRT* gene was generated by inserting an 18 bp I-SceI recognition site into exon 6 of the *HPRT* gene using gene targeting. Reporter cells were transfected with the *I-SceI* plasmid 48 hr after siRNA knockdowns. The cells were allowed to repair in a nonselective medium for 5 days before seeding and selecting for HPRT-negative cells using 6-TG (15  $\mu$ g/ml).

The mutation frequency was calculated as the number of HPRT-negative colonies divided by number of cells plated, after correcting for plating efficiency. To determine the mutation sequence, individual single-cell colonies were isolated, and genomic DNA spanning the DSB junction was PCR-amplified using the primers flanking the I-SceI site. Sequence alignment of the PCR products was conducted using the DNA Data Bank of Japan (DDBJ) ClustalW program.

### In Vivo DNA End Resection Assay

DIV4 cells (DSB Inducible via AsiSI [Aymard et al., 2014]) were transfected with siRNA using the Cell Line Nucleofactor kit V (Amaxa) according to the manufacturer's instructions. Forty-eight hours after siRNA transfection, cells were treated or not with 300 nM of 4-hydroxytamoxifen (4OHT) (Sigma; H7904) for 4 hr. DNA was purified using QIAGEN DNeasy kit. Single-stranded DNA generated at an AsiSI-induced DSB was analyzed using the procedure described in Zhou et al. (2014), with the modifications described in Supplemental Experimental Procedures. The percentage of ssDNA was calculated with the following equation:  $\text{ssDNA}\% = 1/(2^{(\Delta\text{Ct}-1)} + 0.5) \times 100$ , where  $\Delta\text{Ct}$  is calculated by subtracting the Ct obtained from mock-digested sample from the BanI-digested sample.

### Generation of Inducible KDM4 Overexpression Cell Lines

U2OS-Flp-In/T-REx cells express the Tet repressor and contain a single Flp-In site (Gordon et al., 2009). U2OS-Flp-In/T-REx/DRGFP cells were generated by integrating the pDR-GFP expression plasmid (Pierce et al., 1999) into the U2OS-Flp-In/T-REx cells. The *KDM4A* cDNA (Genecopoeia) was cloned into

the pDESTrrtto destination vector by a Gateway LR reaction (Life Technologies). U2OS-Flp-In/T-REx or U2OS-Flp-In/T-REx/DRGFP cells were cotransfected with the resulting *KDM4A* destination plasmid and pOG44 (Invitrogen). Stable clones that express the *KDM4A* protein under the control of the T-REx system were subjected to the treatments indicated.

### Data Analysis

Data points from individual assays represent mean  $\pm$  SEM. Statistical significance between two conditions was assessed by a two-tailed unpaired t test. \* $p < 0.05$ , \*\* $p < 0.01$ , \*\*\* $p < 0.001$ , and n.s. represents  $p \geq 0.05$ .

Full details of all other experimental procedures are given in the Supplemental Experimental Procedures.

## SUPPLEMENTAL INFORMATION

Supplemental Information includes Supplemental Experimental Procedures and five figures and can be found with this article online at <http://dx.doi.org/10.1016/j.celrep.2014.05.026>.

## AUTHOR CONTRIBUTIONS

S.X.P., S.A., L.-P.Z., S.S., and F.A. designed and performed experiments. The HPRT<sup>+</sup>-I-SceI assay was developed by A.C.G.P. The FLIP-IN cells and plasmids were developed by C.Z.B., T.C.H., A.C.G.P., T.H., N.B.L.T., and G.L. supervised the work. T.C.H. and S.X.P. wrote the manuscript with discussion and input from all authors. Experiments in Figure 1 were performed by S.A., with technology developed by A.C.G.P.; Figure 2 was performed by S.X.P. and S.A.; Figure 3 was performed by S.X.P. and L.-P.Z.; Figure 4 was performed by S.S. and S.X.P., with technology developed by C.Z.B.; Figure 5 was performed by S.S., L.-P.Z., S.X.P., and F.A.; Figure 6 was produced by S.X.P. Experiments in Figure S1 were performed by S.A. and S.S.; Figure S2 was performed by S.X.P. and S.A.; Figure S3 was performed by L.-P.Z.; Figure S4 was performed by S.X.P. and S.S.; Figure S5 was performed by F.A. and S.X.P.

## ACKNOWLEDGMENTS

We thank David Allis for the *H3.3* and *H3.3K36M* lentiviral vectors; Catherine Millar for the U2OS-Flp-In/T-REx cell line; Atsushi Shibata and Hideaki Hogiwarara for the NHEJ reporter cell line; Wojciech Niedzwiedz for the siRNAs against CtIP; and Annika Baude and Jiri Lukas for CtIP-GFP U2OS cells. We thank Mick Woodcock for helping with FACS analysis and Fereydoon Ahrabi for statistical analysis. We thank Peter McHugh and Valentine Macaulay for helpful discussions. This research was supported by the Medical Research Council (C.Z.B., T.H., S.S., T.C.H. grant R066538 and R19583), (L.-P.Z., N.B.L.T. grant ANRUBT00); Cancer Research UK (S.A. grant C5255/A15935) (L.-P.Z., N.L.T. grant 300/A13058); the Clarendon Scholarship (S.A., S.X.P.); the BBSRC (A.C.G.P. grant BB/H003371/1 and C.Z.B. grant BB/K019597/1); the Agence Nationale pour la Recherche (G.L. grant ANR-09-JCJC-0138); Association Contre le Cancer (G.L., F.A.); and the Torsten and Söderberg Foundation (T.H.).

Received: December 20, 2013

Revised: April 16, 2014

Accepted: May 12, 2014

Published: June 12, 2014

## REFERENCES

- Adamson, B., Smogorzewska, A., Sigoillot, F.D., King, R.W., and Elledge, S.J. (2012). A genome-wide homologous recombination screen identifies the RNA-binding protein RBM8 as a component of the DNA-damage response. *Nat. Cell Biol.* 14, 318–328.
- Al Sarakbi, W., Sasi, W., Jiang, W.G., Roberts, T., Newbold, R.F., and Mokbel, K. (2009). The mRNA expression of SETD2 in human breast cancer: correlation with clinico-pathological parameters. *BMC Cancer* 9, 290.

- Alexandrov, L.B., Nik-Zainal, S., Wedge, D.C., Aparicio, S.A., Behjati, S., Biankin, A.V., Bignell, G.R., Bolli, N., Borg, A., Borresen-Dale, A.L., et al. (2013). Australian Pancreatic Cancer Genome Initiative; ICGC Breast Cancer Consortium; ICGC MML-Seq Consortium; ICGC PedBrain (2013). Signatures of mutational processes in human cancer. *Nature* 500, 415–421.
- Arnaudeau, C., Lundin, C., and Helleday, T. (2001). DNA double-strand breaks associated with replication forks are predominantly repaired by homologous recombination involving an exchange mechanism in mammalian cells. *J. Mol. Biol.* 307, 1235–1245.
- Aymard, F., Bugler, B., Schmidt, C.K., Guillou, E., Caron, P., Briois, S., Iacovoni, J.S., Daburon, V., Miller, K.M., Jackson, S.P., and Legube, G. (2014). Transcriptionally active chromatin recruits homologous recombination at DNA double-strand breaks. *Nat. Struct. Mol. Biol.* 21, 366–374.
- Berry, W.L., and Janknecht, R. (2013). KDM4/JMJD2 histone demethylases: epigenetic regulators in cancer cells. *Cancer Res.* 73, 2936–2942.
- Black, J.C., Manning, A.L., Van Rechem, C., Kim, J., Ladd, B., Cho, J., Pineda, C.M., Murphy, N., Daniels, D.L., Montagna, C., et al. (2013). KDM4A lysine demethylase induces site-specific copy gain and rereplication of regions amplified in tumors. *Cell* 154, 541–555.
- Couture, J.F., Collazo, E., Ortiz-Tello, P.A., Brunzelle, J.S., and Trievel, R.C. (2007). Specificity and mechanism of JMJD2A, a trimethyllysine-specific histone demethylase. *Nat. Struct. Mol. Biol.* 14, 689–695.
- Dalgliesh, G.L., Furge, K., Greenman, C., Chen, L., Bignell, G., Butler, A., Davies, H., Edkins, S., Hardy, C., Latimer, C., et al. (2010). Systematic sequencing of renal carcinoma reveals inactivation of histone modifying genes. *Nature* 463, 360–363.
- Daugaard, M., Baude, A., Fugger, K., Povlsen, L.K., Beck, H., Sørensen, C.S., Petersen, N.H., Sorensen, P.H., Lukas, C., Bartek, J., et al. (2012). LEDGF (p75) promotes DNA-end resection and homologous recombination. *Nat. Struct. Mol. Biol.* 19, 803–810.
- Edmunds, J.W., Mahadevan, L.C., and Clayton, A.L. (2008). Dynamic histone H3 methylation during gene induction: HYPB/Setd2 mediates all H3K36 trimethylation. *EMBO J.* 27, 406–420.
- Eidahl, J.O., Crowe, B.L., North, J.A., McKee, C.J., Shkriabai, N., Feng, L., Plumb, M., Graham, R.L., Gorelick, R.J., Hess, S., et al. (2013). Structural basis for high-affinity binding of LEDGF PWWP to mononucleosomes. *Nucleic Acids Res.* 41, 3924–3936.
- Fnu, S., Williamson, E.A., De Haro, L.P., Brennehan, M., Wray, J., Shaheen, M., Radhakrishnan, K., Lee, S.H., Nickoloff, J.A., and Hromas, R. (2011). Methylation of histone H3 lysine 36 enhances DNA repair by nonhomologous end-joining. *Proc. Natl. Acad. Sci. USA* 108, 540–545.
- Fontebasso, A.M., Schwartztruber, J., Khuong-Quang, D.A., Liu, X.Y., Sturm, D., Korshunov, A., Jones, D.T., Witt, H., Kool, M., Albrecht, S., et al. (2013). Mutations in SETD2 and genes affecting histone H3K36 methylation target hemispheric high-grade gliomas. *Acta Neuropathol.* 125, 659–669.
- Gerlinger, M., Rowan, A.J., Horswell, S., Larkin, J., Endesfelder, D., Gronroos, E., Martinez, P., Matthews, N., Stewart, A., Tarpey, P., et al. (2012). Intratumor heterogeneity and branched evolution revealed by multiregion sequencing. *N. Engl. J. Med.* 366, 883–892.
- Gordon, W.R., Vardar-Ulu, D., L'Heureux, S., Ashworth, T., Malecki, M.J., Sanchez-Irizarry, C., McArthur, D.G., Histén, G., Mitchell, J.L., Aster, J.C., and Blacklow, S.C. (2009). Effects of S1 cleavage on the structure, surface export, and signaling activity of human Notch1 and Notch2. *PLoS ONE* 4, e6613.
- Heyer, W.D., Ehmsen, K.T., and Liu, J. (2010). Regulation of homologous recombination in eukaryotes. *Annu. Rev. Genet.* 44, 113–139.
- Iacovoni, J.S., Caron, P., Lassadi, I., Nicolas, E., Massip, L., Trouche, D., and Legube, G. (2010). High-resolution profiling of gammaH2AX around DNA double strand breaks in the mammalian genome. *EMBO J.* 29, 1446–1457.
- Jasin, M. (1996). Genetic manipulation of genomes with rare-cutting endonucleases. *Trends Genet.* 12, 224–228.
- Jeggo, P., and Lavin, M.F. (2009). Cellular radiosensitivity: how much better do we understand it? *Int. J. Radiat. Biol.* 85, 1061–1081.
- Klose, R.J., Yamane, K., Bae, Y., Zhang, D., Erdjument-Bromage, H., Tempst, P., Wong, J., and Zhang, Y. (2006). The transcriptional repressor JHDM3A demethylates trimethyl histone H3 lysine 9 and lysine 36. *Nature* 442, 312–316.
- Lawrence, M.S., Stojanov, P., Mermel, C.H., Robinson, J.T., Garraway, L.A., Golub, T.R., Meyerson, M., Gabriel, S.B., Lander, E.S., and Getz, G. (2014). Discovery and saturation analysis of cancer genes across 21 tumour types. *Nature* 505, 495–501.
- Lewis, P.W., Müller, M.M., Koletsky, M.S., Cordero, F., Lin, S., Banaszynski, L.A., Garcia, B.A., Muir, T.W., Becher, O.J., and Allis, C.D. (2013). Inhibition of PRC2 activity by a gain-of-function H3 mutation found in pediatric glioblastoma. *Science* 340, 857–861.
- Li, F., Mao, G., Tong, D., Huang, J., Gu, L., Yang, W., and Li, G.M. (2013). The histone mark H3K36me3 regulates human DNA mismatch repair through its interaction with MutS $\alpha$ . *Cell* 153, 590–600.
- Lieber, M.R. (2010). The mechanism of double-strand DNA break repair by the nonhomologous DNA end-joining pathway. *Annu. Rev. Biochem.* 79, 181–211.
- McVey, M., and Lee, S.E. (2008). MMEJ repair of double-strand breaks (director's cut): deleted sequences and alternative endings. *Trends Genet.* 24, 529–538.
- Moynahan, M.E., Cui, T.Y., and Jasin, M. (2001). Homology-directed dna repair, mitomycin-c resistance, and chromosome stability is restored with correction of a Brca1 mutation. *Cancer Res.* 61, 4842–4850.
- Newbold, R.F., and Mokbel, K. (2010). Evidence for a tumour suppressor function of SETD2 in human breast cancer: a new hypothesis. *Anticancer Res.* 30, 3309–3311.
- Ogiwara, H., Ui, A., Otsuka, A., Satoh, H., Yokomi, I., Nakajima, S., Yasui, A., Yokota, J., and Kohno, T. (2011). Histone acetylation by CBP and p300 at double-strand break sites facilitates SWI/SNF chromatin remodeling and the recruitment of non-homologous end joining factors. *Oncogene* 30, 2135–2146.
- Pei, H., Zhang, L., Luo, K., Qin, Y., Chesni, M., Fei, F., Bergsagel, P.L., Wang, L., You, Z., and Lou, Z. (2011). MMSET regulates histone H4K20 methylation and 53BP1 accumulation at DNA damage sites. *Nature* 470, 124–128.
- Pierce, A.J., Johnson, R.D., Thompson, L.H., and Jasin, M. (1999). XRCC3 promotes homology-directed repair of DNA damage in mammalian cells. *Genes Dev.* 13, 2633–2638.
- Rea, S., Eisenhaber, F., O'Carroll, D., Strahl, B.D., Sun, Z.W., Schmid, M., Opravil, S., Mechtler, K., Ponting, C.P., Allis, C.D., and Jenuwein, T. (2000). Regulation of chromatin structure by site-specific histone H3 methyltransferases. *Nature* 406, 593–599.
- Sartori, A.A., Lukas, C., Coates, J., Mistrik, M., Fu, S., Bartek, J., Baer, R., Lukas, J., and Jackson, S.P. (2007). Human CtIP promotes DNA end resection. *Nature* 450, 509–514.
- Sato, Y., Yoshizato, T., Shiraishi, Y., Maekawa, S., Okuno, Y., Kamura, T., Shimamura, T., Sato-Otsubo, A., Nagae, G., Suzuki, H., et al. (2013). Integrated molecular analysis of clear-cell renal cell carcinoma. *Nat. Genet.* 45, 860–867.
- Shanbhag, N.M., Rafalska-Metcalf, I.U., Balane-Bolivar, C., Janicki, S.M., and Greenberg, R.A. (2010). ATM-dependent chromatin changes silence transcription in cis to DNA double-strand breaks. *Cell* 141, 970–981.
- Smeenk, G., and van Attikum, H. (2013). The chromatin response to DNA breaks: leaving a mark on genome integrity. *Annu. Rev. Biochem.* 82, 55–80.
- Strahl, B.D., Grant, P.A., Briggs, S.D., Sun, Z.W., Bone, J.R., Caldwell, J.A., Mollah, S., Cook, R.G., Shabanowitz, J., Hunt, D.F., and Allis, C.D. (2002). Set2 is a nucleosomal histone H3-selective methyltransferase that mediates transcriptional repression. *Mol. Cell. Biol.* 22, 1298–1306.
- Sugiyama, T., New, J.H., and Kowalczykowski, S.C. (1998). DNA annealing by RAD52 protein is stimulated by specific interaction with the complex of replication protein A and single-stranded DNA. *Proc. Natl. Acad. Sci. USA* 95, 6049–6054.
- Symington, L.S., and Gautier, J. (2011). Double-strand break end resection and repair pathway choice. *Annu. Rev. Genet.* 45, 247–271.
- Wagner, E.J., and Carpenter, P.B. (2012). Understanding the language of Lys36 methylation at histone H3. *Nat. Rev. Mol. Cell Biol.* 13, 115–126.

- Whetstine, J.R., Nottke, A., Lan, F., Huarte, M., Smolikov, S., Chen, Z., Spooner, E., Li, E., Zhang, G., Colaiacovo, M., and Shi, Y. (2006). Reversal of histone lysine trimethylation by the JMJD2 family of histone demethylases. *Cell* *125*, 467–481.
- Yoh, S.M., Lucas, J.S., and Jones, K.A. (2008). The Iws1:Spt6:CTD complex controls cotranscriptional mRNA biosynthesis and HYPB/Setd2-mediated histone H3K36 methylation. *Genes Dev.* *22*, 3422–3434.
- Zhang, J., Ding, L., Holmfeldt, L., Wu, G., Heatley, S.L., Payne-Turner, D., Easton, J., Chen, X., Wang, J., Rusch, M., et al. (2012). The genetic basis of early T-cell precursor acute lymphoblastic leukaemia. *Nature* *481*, 157–163.
- Zhou, Y., Caron, P., Legube, G., and Paull, T.T. (2014). Quantitation of DNA double-strand break resection intermediates in human cells. *Nucleic Acids Res.* *42*, e19.
- Zhu, X., He, F., Zeng, H., Ling, S., Chen, A., Wang, Y., Yan, X., Wei, W., Pang, Y., Cheng, H., et al. (2014). Identification of functional cooperative mutations of SETD2 in human acute leukemia. *Nat. Genet.* *46*, 287–293.



# **SETD2-dependent histone H3K36 trimethylation is required for homologous recombination repair and genome stability**

Sophia X Pfister, Sara Ahrabi, Lykourgos-Panagiotis Zalmas, Sovan Sarkar, François Aymard, Csanád Z Bachrati, Thomas Helleday, Gaëlle Legube, Nicholas B La Thangue, Andrew C G Porter and Timothy C Humphrey

Pfister et al Supplemental Figure S1 (related to Figure 1)

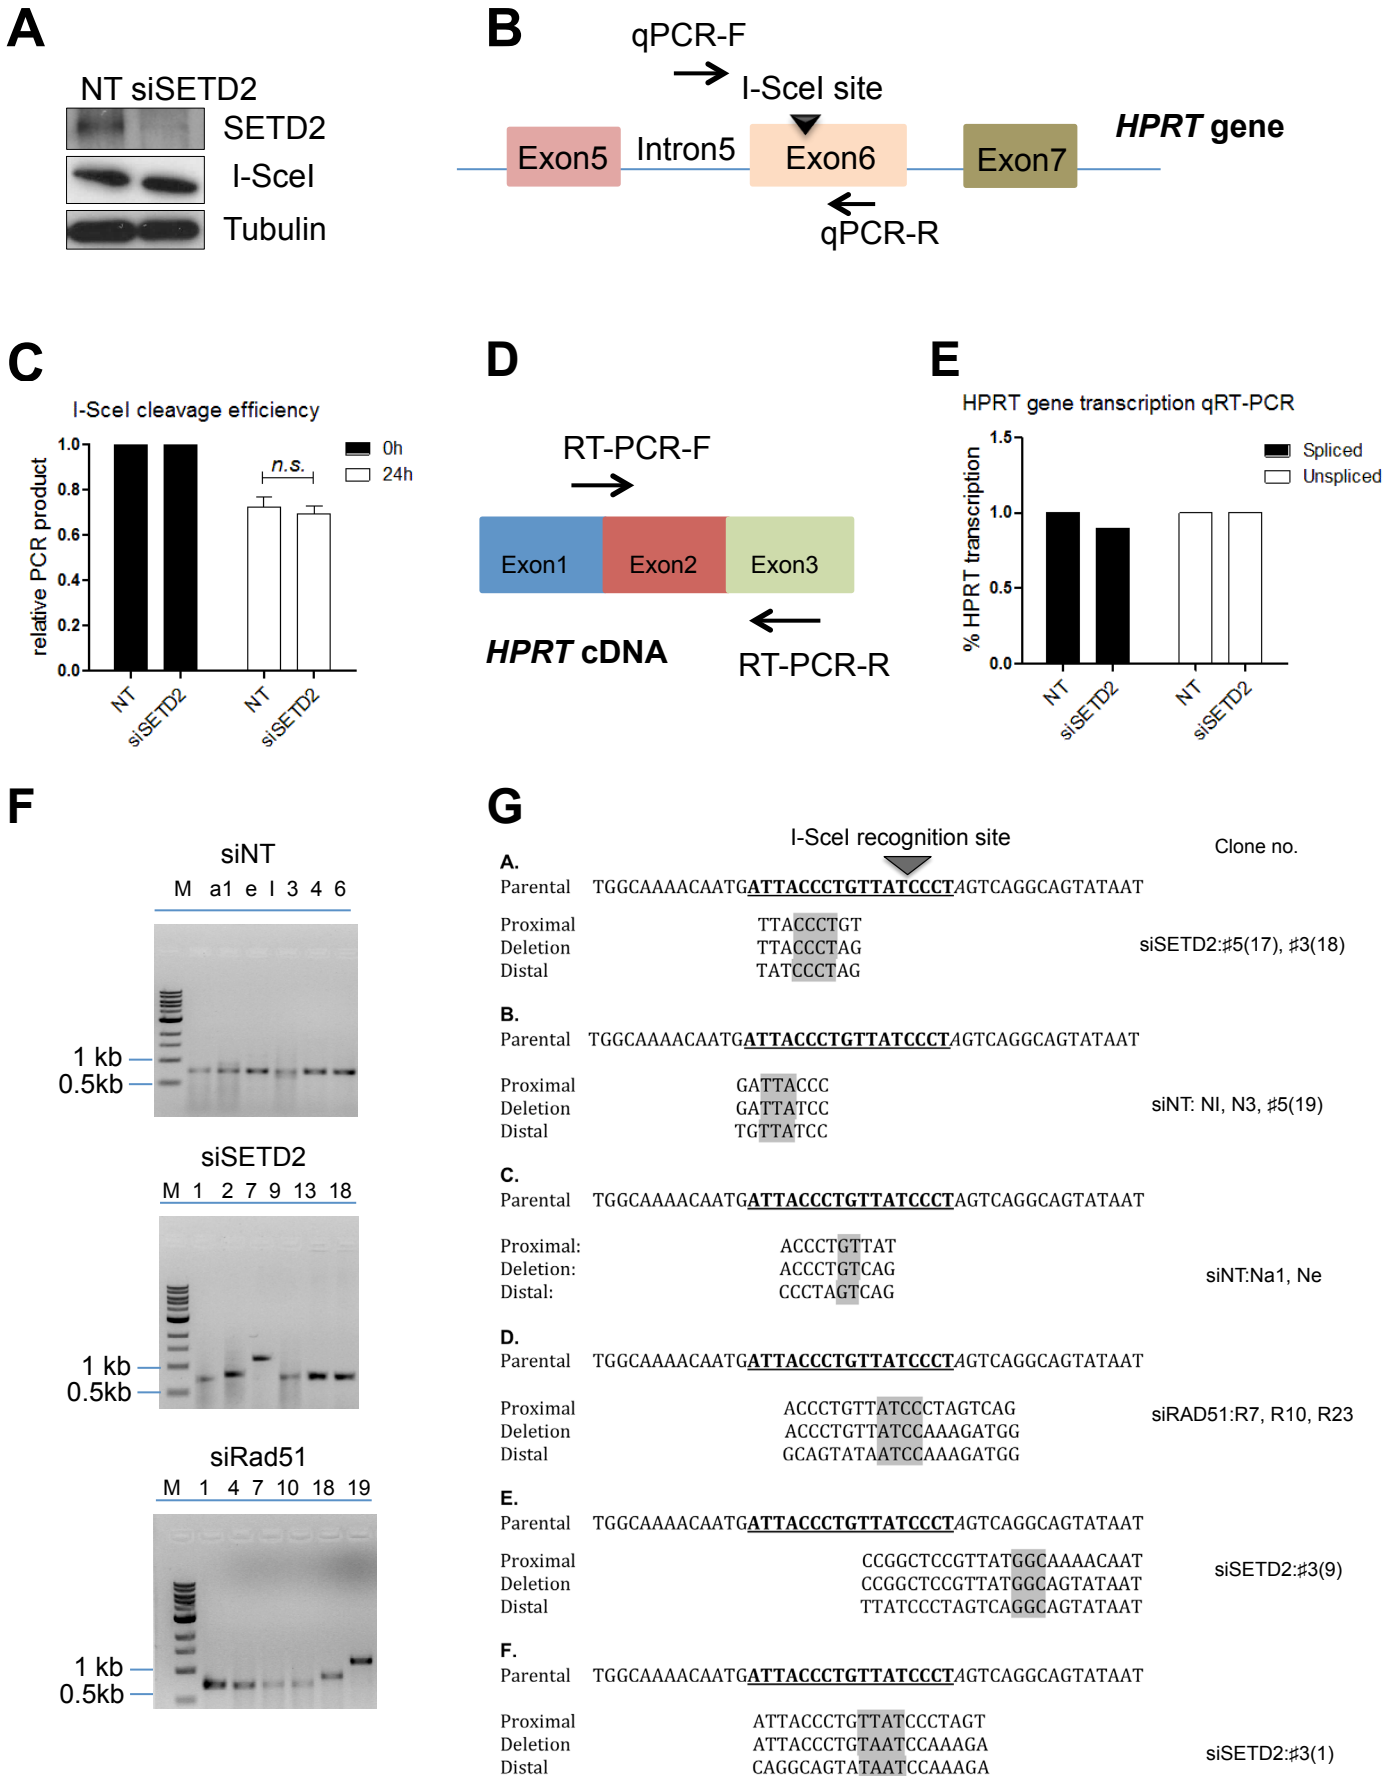

**Figure S1. HPRT assay. Related to Figure 1.**

- (A) Western blot showing SETD2 knockdown and I-SceI expression in the HPRT assay. Cells were transfected with non-targeting control (NT) siRNA or SETD2 siRNA for 48 hours before I-SceI transfection. Samples were harvested 24 hours after I-SceI transfection.
- (B) Schematic map showing the qPCR primers used to amplify the region flanking the I-SceI site for assessing I-SceI cutting efficiency.
- (C) Quantification of the I-SceI cleavage efficiency in the NT and SETD2 depleted cells in the HPRT assay. Cells were treated with NT or SETD2 siRNA for 48 hours before I-SceI transfection. Genomic DNA samples were harvested 0 hours or 24 hours after I-SceI transfection. qPCR primers shown in (B) were used to amplify the genomic DNA. The reduction in the amount of amplified product compared to the 0 hours represents the fraction cleaved by I-SceI. Error bars show SEM from three independent experiments.
- (D) Schematic map showing the qRT-PCR exonic primers used to amplify the spliced HPRT mRNA.
- (E) qRT-PCR quantification of HPRT mRNA in the NT and SETD2 depleted cells. Spliced mRNA was amplified by the exonic primers shown in (D) and unspliced mRNA was amplified by the intronic/exonic primers shown in (B).
- (F) Gels showing PCR product sizes from randomly selected HPRT-negative clones generated in cells transfected with NT siRNA (upper panel), SETD2 siRNAs (si#3 or si#5) (middle panel), or RAD51 siRNAs (bottom panel).
- (G) Examples of deletion junctions of HPRT-negative clones from NT, SETD2 and RAD51 depleted cells that have undergone microhomology mediated end joining (MMEJ). For each individual junction the parental sequence of the HPRT gene loci and the intervening I-SceI site (underlined) sequence has been indicated on the top. Junctional microhomologies between the proximal and distal reference sequences are shown in gray. The examples of HPRT-negative clones relating to each type of MMEJ are indicated on the right.

Pfister et al Supplemental Figure S2 (related to Figure 2 and 3)

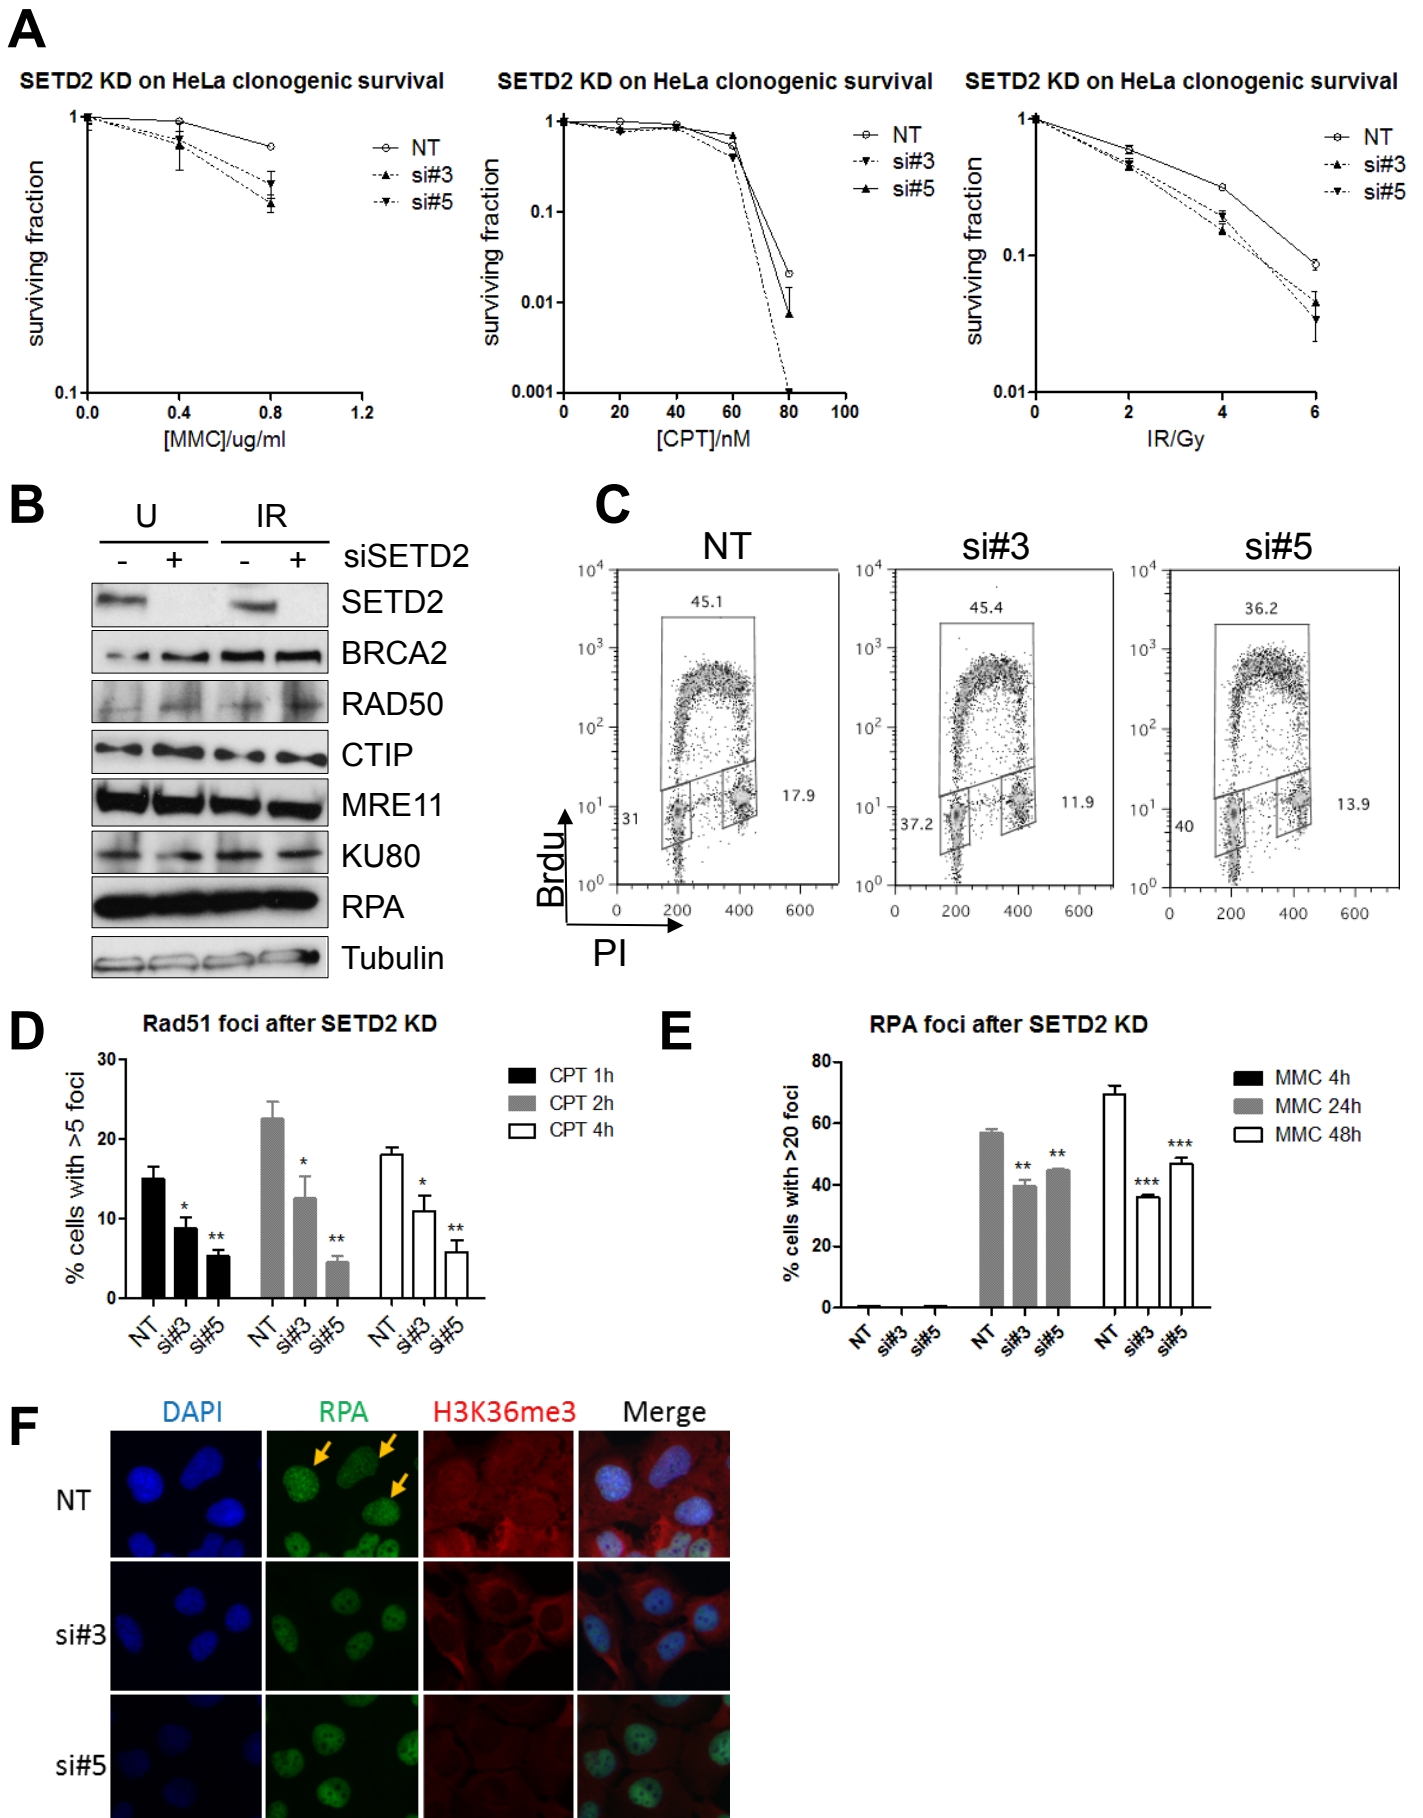

**Figure S2. SETD2 is required for HR. Related to Figure 2 and 3.**

- (A) Clonogenic survival of SETD2 knockdown (si#3 and si#5) or control (NT) in HeLa cells treated with indicated concentrations of Mitomycin C (MMC), Camptothecin (CPT) or ionising radiation (IR). Error bars show SEM from three independent experiments.
- (B) Western blot analysis of the protein levels of major HR and NHEJ factors before and after SETD2 knockdown, in the presence or absence of IR damage (5Gy following 2 hours of repair).
- (C) Cell cycle analysis by FACS showing BrdU incorporation in U2OS cells treated with control (NT) or SETD2 siRNA (si#3 and si#5) for 48 hours.
- (D) RAD51 foci formation at indicated times of CPT treatment (10 $\mu$ M) in U2OS cells treated with non-targeting control siRNA (NT) or SETD2 siRNAs (si#3 and si#5). Error bars show SEM from three independent experiments. \*P<0.05, \*\*P<0.01.
- (E) RPA32 foci formation at indicated times after 2-hour treatment with MMC (2 $\mu$ M) in U2OS cells treated with non-targeting control siRNA (NT) or SETD2 siRNAs (si#3 and si#5). Error bars show SEM from three independent experiments. \*\*\*P<0.001, \*\*P<0.01.
- (F) Loss of H3K36me3 in the nuclei after SETD2 knockdown is visualised by immunofluorescence (IF). Double staining of antibodies against RPA32 (mouse, Abcam) and H3K36me3 (rabbit, Abcam) after 1-hour treatment with CPT (10 $\mu$ M) in U2OS cells treated with non-targeting control siRNA (NT) or SETD2 siRNAs (si#3 and si#5).



Pfister et al Supplemental Figure S3 (related to Figure 3)

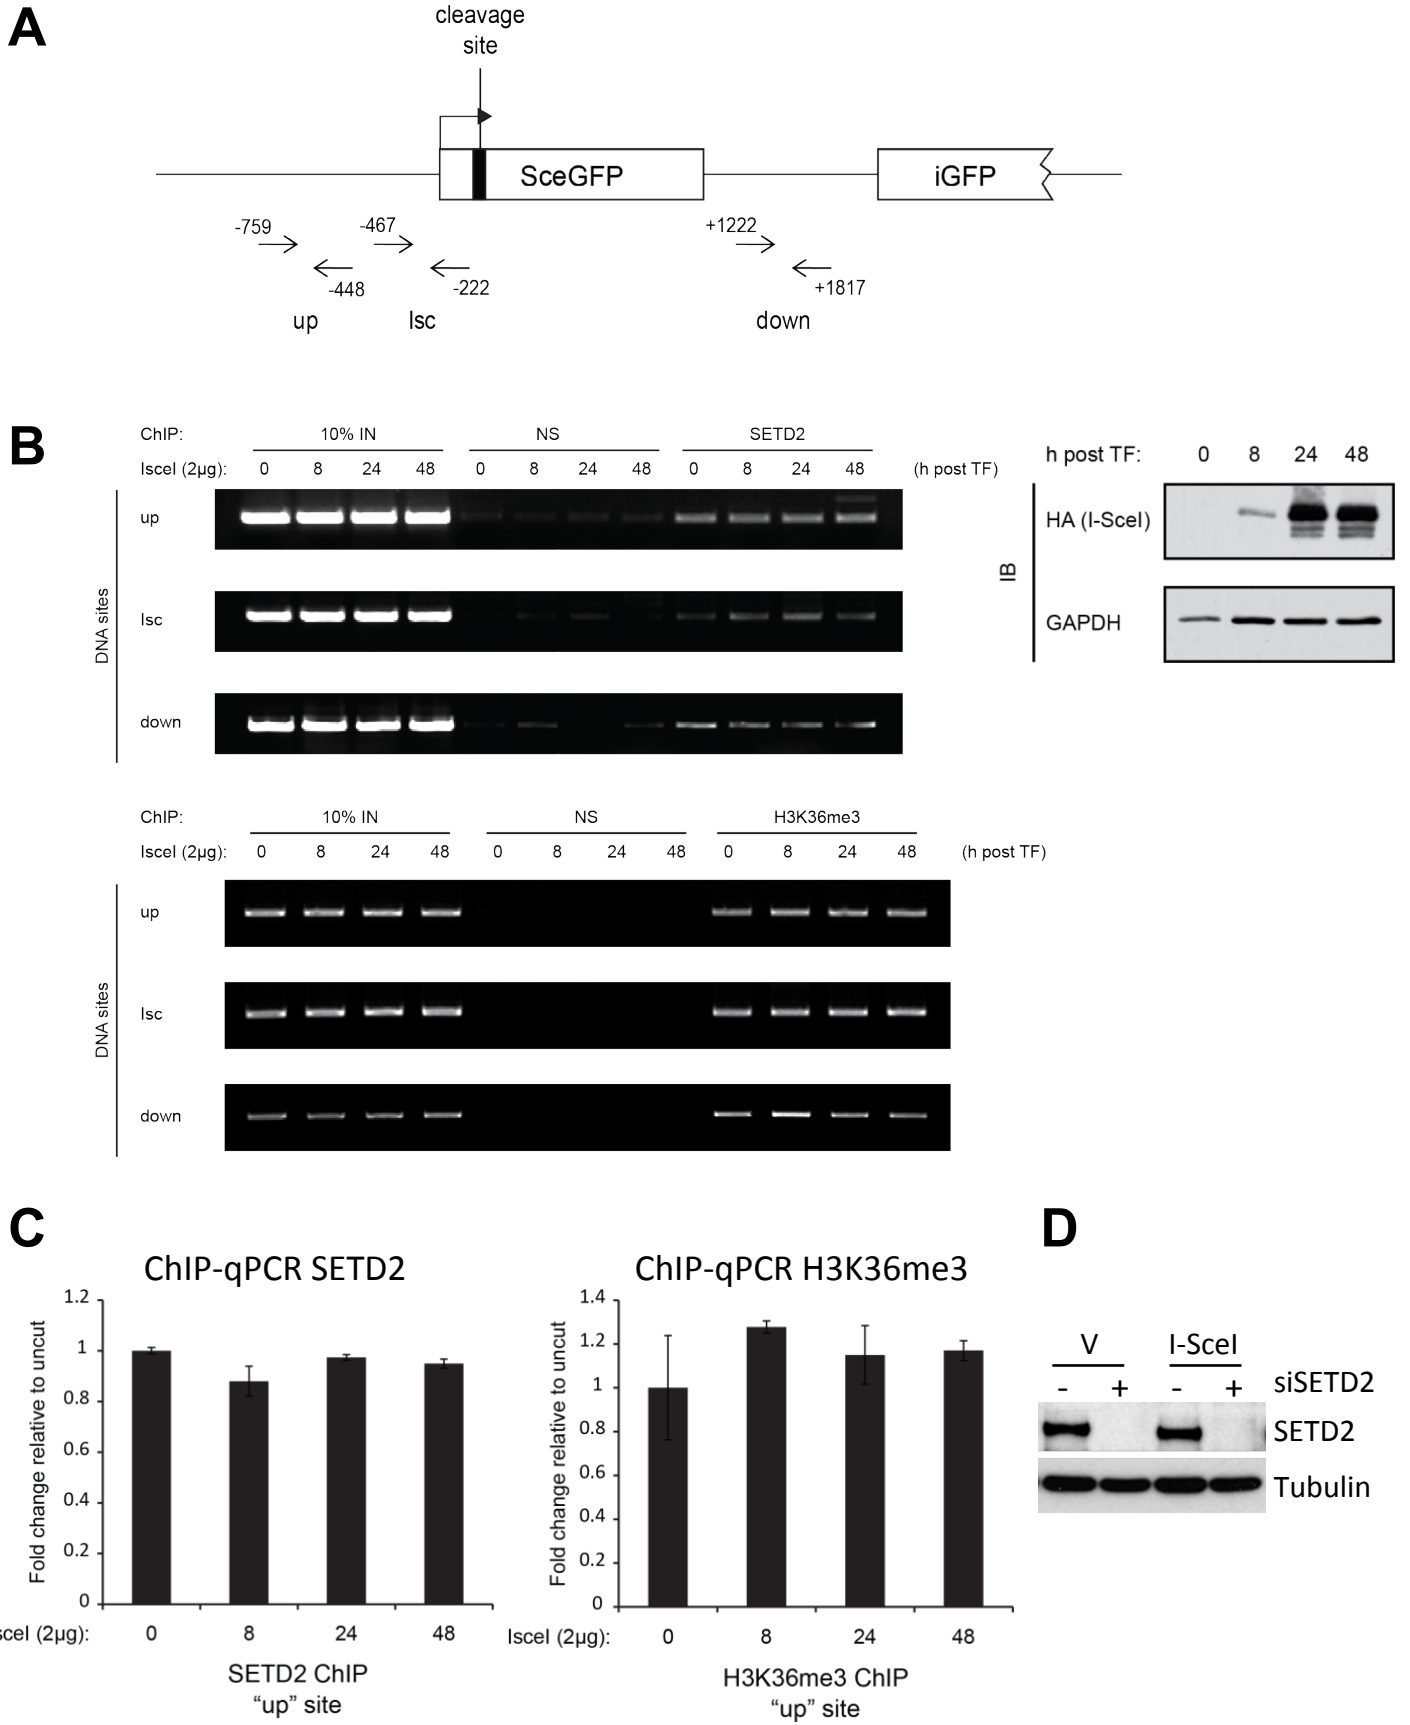

**Figure S3. Analysis of SETD2 and H3K36me3 at the break-site. Related to Figure 3.**

- (A) Schematic map of the DR-GFP cassette, where arrows indicate the PCR primers used to amplify genomic DNA after ChIP. The positions of primers and the amplified genomic sites ('up', 'Isc', 'down') are indicated.
- (B) ChIP analysis on DR-GFP U2OS cells transfected with I-SceI plasmid and harvested at the indicated times post-transfection. ChIP was performed on the lysate using antibodies against SETD2 (Abcam) or H3K36me3 (Abcam) or non-specific Ig (NS); inputs (IN) are also indicated. The three PCR primer pairs (covering "up", "Isc" and "down" sites) are shown on the schematic map. Also shown is an immunoblot (IB) of HA-I-SceI protein levels over the timecourse; GAPDH serves as a loading control.
- (C) ChIP-qPCR analysis of enrichment of SETD2 or H3K36me3 at the "up" site. The data are presented as fold change over the uncut condition (0; non-IscI induced: column 1). Fold changes were calculated from  $2^{-\Delta\Delta Ct}$  values;  $\Delta\Delta Ct = \Delta Ct_{SP} - \Delta Ct_{NS}$ , where SP stands for specific IPs, and NS stands for non-specific IPs (background).  $\Delta Ct = Ct_{IP} - \text{corrected } Ct_{IN}$ , where  $\text{corrected } Ct_{IN} = Ct_{IN} - \log_2 10$  to account for the 1/10 dilution factor of the IN; IP:immunoprecipitation, IN:input chromatin. Error bars show SD from three experiments.
- (D) Western blot confirming SETD2 knockdown in the cells used for ChIP. Samples were taken from the ChIP experiment shown in Figure 3D.

Pfister et al Supplemental Figure S4 (related to Figure 4)

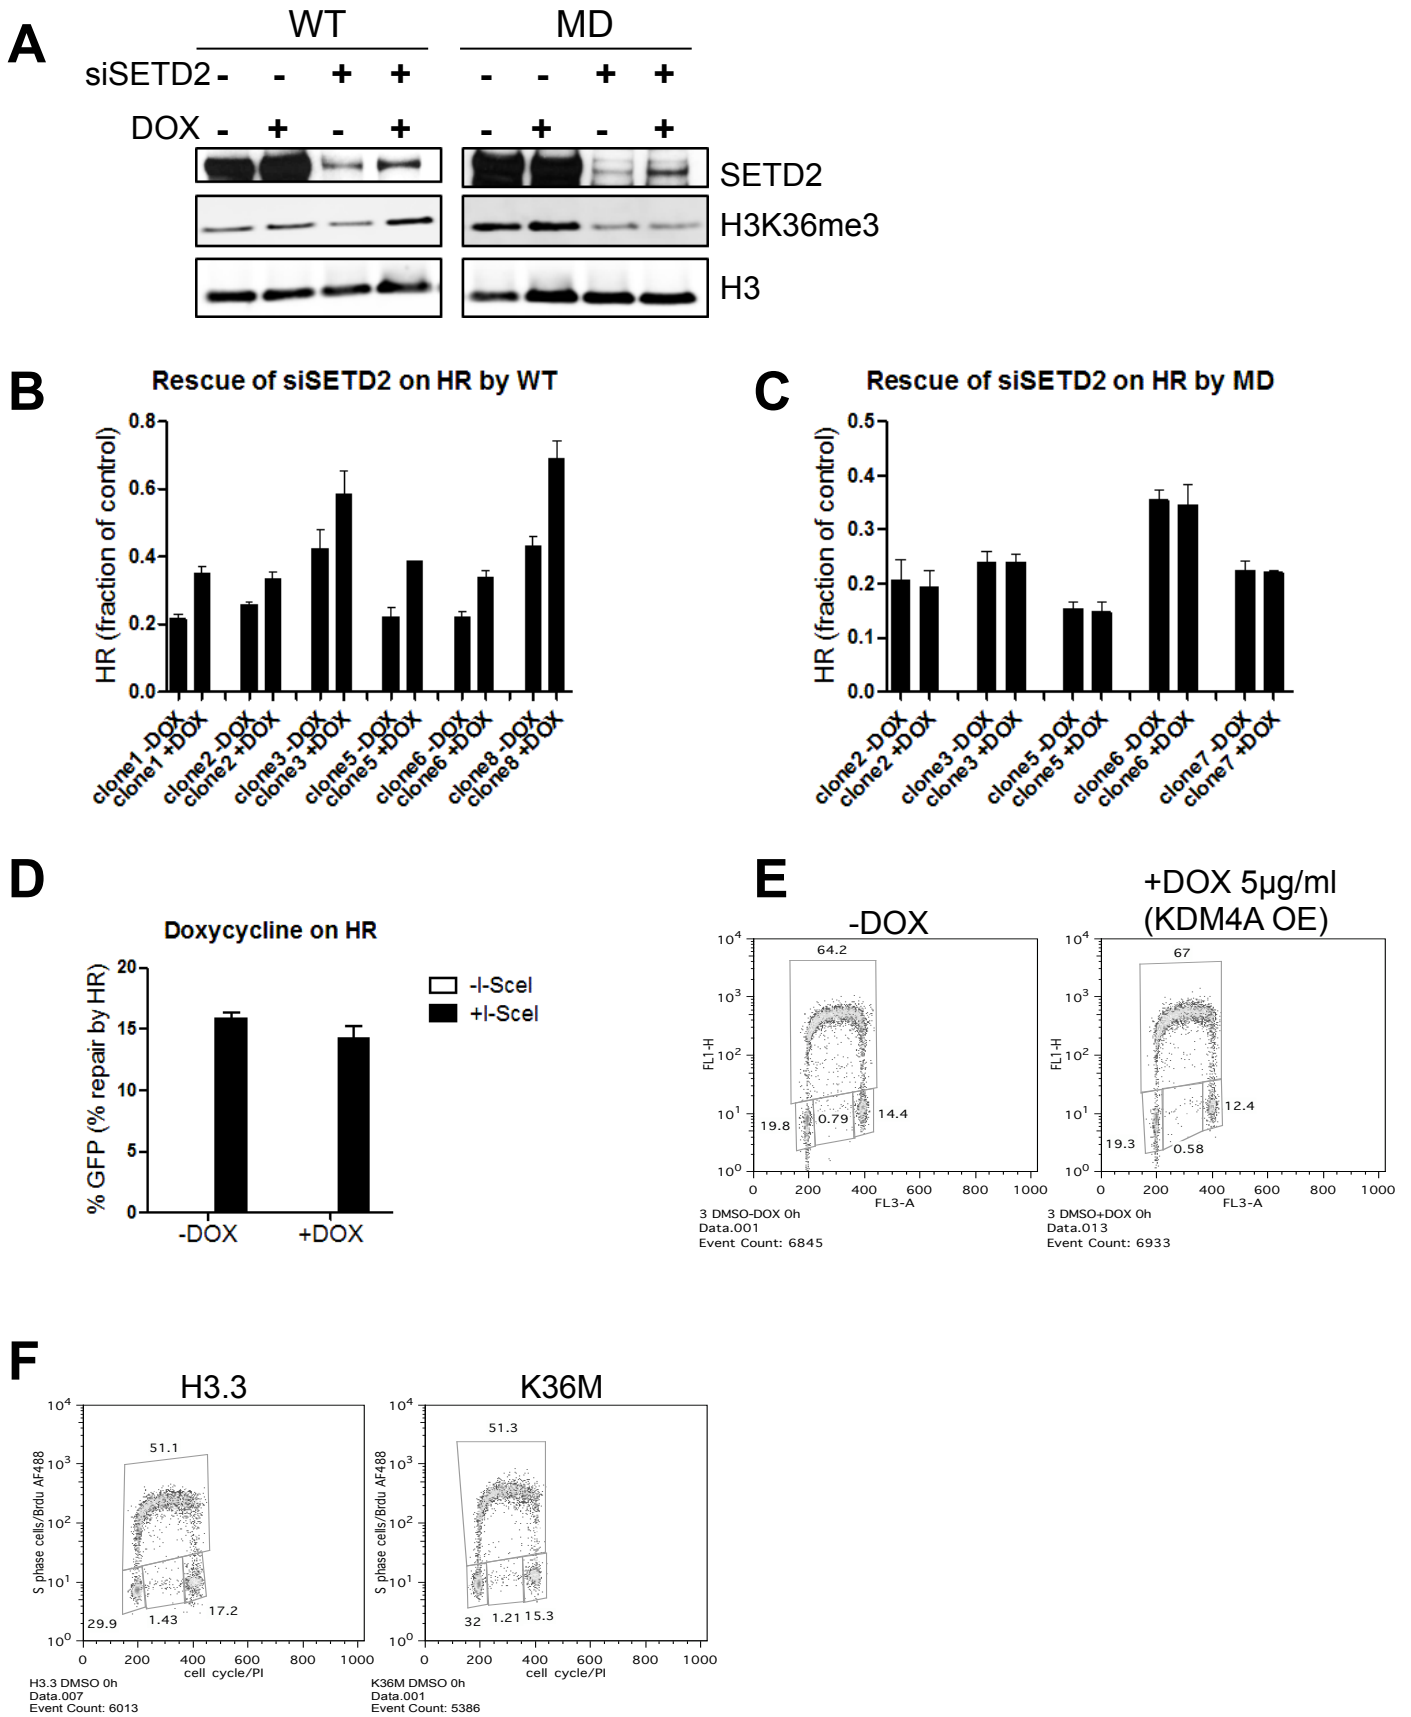

**Figure S4. H3K36me3 is required for HR. Related to Figure 4.**

- (A) Western blots showing the induction of SETD2 protein expression by Doxycycline (5 $\mu$ g/ml) in T-REx DR-GFP SETD2 clones 48 hours after NT or SETD2 siRNA treatment. The clone expressing wild-type (WT) SETD2 cDNA shows rescue of H3K36me3 levels after siSETD2. The clone expressing methyltransferase-dead (MD) SETD2 cDNA shows no rescue of H3K36me3 levels after siSETD2.
- (B) Rescue of HR efficacy after SETD2 siRNA treatment in six independent wild-type (WT) SETD2 clones. Error bars show SEM from three technical replicates.
- (C) Lack of rescue of HR efficacy after SETD2 siRNA treatment in five independent methyltransferase-dead (MD) SETD2 clones. Error bars show SEM from three technical repeats.
- (D) The HR efficacy in parental T-REx DR-GFP U2OS cells (without any cDNA integration) with or without Doxycycline (5 $\mu$ g/ml) treatment. Error bars show SEM from three independent experiments.
- (E) Cell cycle distribution of T-REx KDM4A U2OS cells with or without induction of KDM4A by Doxycycline (5 $\mu$ g/ml).
- (F) Cell cycle distribution of U2OS cells expressing H3.3 or H3.3K36M transgene.

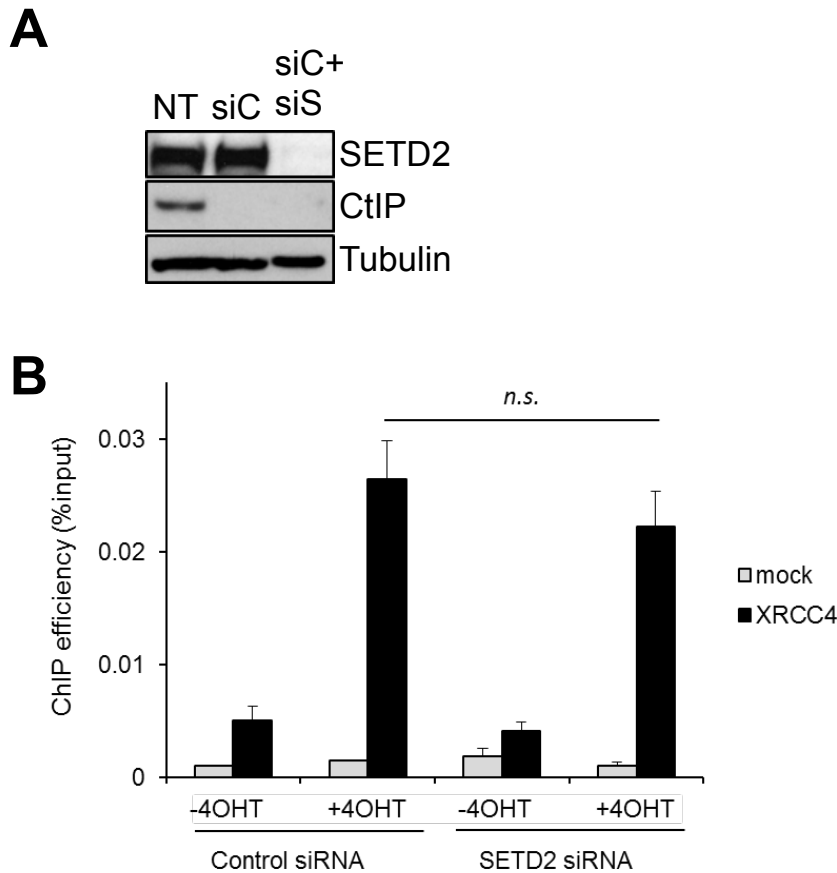

**Figure S5. SETD2 promotes DSB end resection. Related to Figure 5.**

- (A) Western blots showing the single or double knockdown of CtIP (siC), SETD2 (siS) or both CtIP and SETD2 (siC+siS) in the experiment shown in Figure 5D.
- (B) XRCC4 ChIP were performed in 4OHT treated DlvA cells and analysed close to (<100bp) selected DSBs. ChIP efficiencies (as % of input) are shown for DSB-II, a DSB reported as RAD51-bound in (Aymard et al., 2014). The mean and SEM (n=4, technical replicate) of a representative experiment are presented. Note that SETD2 siRNA does not drastically affect XRCC4 binding at DSB, indicative of an equivalent cleavage in SETD2 depleted and control cells.



## **SUPPLEMENTAL EXPERIMENTAL PROCEDURES**

### **Cell Culture**

U2OS (human osteosarcoma) cells were cultured at 37°C with 5% CO<sub>2</sub> in Dulbecco's modified Eagle's medium supplemented with 10% v/v foetal bovine serum and penicillin(100 units/ml) and streptomycin (0.1 mg/ml). HR reporter UGFP#1 cells (U2OS with integrated pDR-GFP reporter construct (Pierce et al., 1999) were maintained in 7µg/ml Puromycin. NHEJ reporter cells (H1299 non-small cell lung carcinoma cells with integrated NHEJ reporter) were a kind gift from Atsushi Shibata and Takashi Kohno and were maintained in 2µg/ml Puromycin. U2OS-CtIP cells (U2OS cells with integrated GFP-tagged CtIP) were kind gift from Annika Baude and Jiri Lukas and were maintained in 5µg/ml Puromycin. HT1080 cells were supplemented with 1% Sodium Pyruvate (100mM), 1% L-Glutamine (200 mM), 25% MEM (amino acids) and HAT medium before the I-SceI transfection, and 6-TG medium 5 days after the I-SceI transfections.

### **I-SceI inducible HPRT Mutation Assay**

Construction of cells with a functional but I-SceI-cleavable *HPRT* gene (clone 5.2.1) from human fibrosarcoma (HT1080) cells will be described in detail elsewhere. Briefly, an 18 bp I-SceI recognition site was inserted into exon 6 of the hypoxanthine phosphoribosyltransferase (*HPRT*) gene using a gene targeting procedure while retaining HPRT function. To assay for I-SceI induced loss of *HPRT* function, clone 5.2.1 was transfected with an I-SceI or a

GFP expression plasmid in 6-well plates 48h after the siRNA knockdowns. The transfection efficiencies were determined after 12h by flow cytometry. The cells were expanded to 100 mm petri dishes after 24h and were kept in non-selective medium. After 5 days,  $10^4$  cells were seeded in triplicate into 100 mm Petri dishes for 12 h and fed with complete medium containing  $15\mu\text{M}$  freshly prepared 6-TG. The plating efficiency was determined similarly, by culturing  $10^3$  cells in the absence of 6-TG. After 10-14 days of culturing, HPRT negative cell colonies were visualised by staining with Brilliant Blue R Concentrate (Sigma).

The mutation frequency was determined by dividing the number of 6-TG-resistant (HPRT negative) colonies by the total number of cells plated after being corrected for the colony-forming ability. To determine the mutation sequence, independent single cell colonies (30 colonies from each background) were isolated in 24-well plates, genomic DNA was extracted and the I-SceI site within the exon 6 was PCR amplified. The PCR products were sequenced (Sanger Sequencing) using the primers flanking the I-SceI site. Sequence alignment was conducted using DNA Data Bank of Japan (DDBJ) ClustalW program (version 2.1). High fidelity Phusion master mix (x2) (New England BioLabs) was used for PCR amplification across the I-SceI site using forward (GATCCTGCACCTACAAAATCC) and reverse (GCATAGGTAAGGTGAGGAGGTG) primers (Sigma). PCR settings were as follows:  $98^\circ\text{C}$  for 30 s, 30 cycles of  $98^\circ\text{C}$  for 10 s,  $67^\circ\text{C}$  for 1 min, and  $72^\circ\text{C}$  for 1min. Products were visualised on 2 % agarose gel with  $0.5\ \mu\text{g/ml}$  ethidium bromide.

### **qPCR for HPRT I-SceI cleavage efficiency**

Genomic DNA was isolated using the Qiagen kit at 0h and 24h after the I-SceI transfection of the HT1080 (clone 5.2.1) cells. Quantitative PCR was performed using 7500 Fast Real-Time PCR detection system (Applied Biosystems). Reactions (25 $\mu$ l each) were prepared in triplicate in a 96-well reaction plate. Each reaction contained 20ng genomic DNA, 200nM of each primer, 10 $\mu$ l water and 12.5 $\mu$ l Absolute Blue QPCR SYBR low ROX Mix (Thermo Scientific). DNA levels were normalized to the GAPDH calculated using a  $2^{-\Delta\Delta C_t}$  method. QPCR settings were as follows: Initialisation at 95 $^{\circ}$ C for 15 min, denaturation at 95 $^{\circ}$ C for 15 seconds, annealing at 60 $^{\circ}$ C for 30 seconds, and extension at 72 $^{\circ}$ C for 30 seconds and repeat for 40 cycles.

Primers used for qPCR are listed below:

qPCR-F: TGGTGAGAATTACTGTGCTGAA

qPCR-R: TGCGACCTTGACCATCTTTG

### **qRT-PCR**

RNA was extracted using RNeasy mini kit (Qiagen). SuperScript $^{\circ}$  VILOTM (Invitrogen/Life Technologies) cDNA synthesis kit was used to reverse transcribe cDNA from total RNA according to manufacturer's instructions.

Quantitative real time PCR was carried out as described in the qPCR section.

Primers used for the qRT-PCR are listed below:

For spliced HPRT mRNA:

RT-PCR-F: CCCTGGCGTCGTGATTAGT

RT-PCR-R: TTCATCACATCTCGAGCAAGAC

For un-spliced HPRT mRNA:

qPCR-F: TGGTGAGAATTACTGTGCTGAA

qPCR-R: TGCGACCTTGACCATCTTTG

For GFP mRNA:

GFP-F: TATATCATGGCCGACA,

GFP-R: ACATGGTCCTGCTGGAGTTC.

Primers are 360-560bp downstream of the I-SceI site and only amplify the SceGFP locus and not the iGFP.

### **Generation of cell lines expressing wild-type or methyltransferase dead SETD2**

Site-directed mutagenesis primers were designed so that the SETD2 cDNA was mutated from the original sequence (AGAAACCGTCTCCAGTCTGTT) to the sequence AGGAATCGGCTGCAATCCGTG without changing any amino acid. The new cDNA is resistant to SETD2 siRNA#3 because it is refractory to siRNA hybridisation. The refractory cDNA was then mutated to abolish the methyltransferase activity at amino acid 1625 (R to G) and 1631 (C to A) by a two-step mutagenesis. Primers for site-directed mutagenesis are listed below:

SS1/SS2 for R1625G, and SS3/SS4 for C1631A.

SS1(CTCAAAAAGGAAATTGCTCTGGTTTCATGAATCACAGCTGT)

SS2(ACAGCTGTGATTCATGAAACCAGAGCAATTTCTTTTTGAG)

SS3(CTCGTTTCATGAATCACAGCGCTGAACCAAATTGTGAAAC)

SS4(GTTTCACAATTTGGTTCAGCGCTGATTCATGAAACGAG)

U2OS-Flp-In/T-Rex/DRGFP cells and pDESTfrtto plasmid as described later were used to generate stable cell lines expressing SETD2 cDNA. U2OS-Flp-In/T-Rex/DRGFP cells were co-transfected with the resulting SETD2

expression plasmid and pOG44 (Invitrogen) in a ratio of 1:9 using Fugene transfection reagent (Promega). 48 hours after transfection, cells were split and stable integrants were selected for by 100µg/ml Hygromycin and 15µg/ml Blasticidin. About 20 days after selection, colonies were isolated and expanded individually. Individual colonies were tested for SETD2 expression in response to Doxycycline by Western blotting. Cells expressing SETD2 under the control of the T-REx system were subsequently subjected to treatments.

### **Generation of inducible KDM4A over-expression cell lines**

The U2OS-Flp-In/T-Rex cell line was originally generated in the laboratory of Jeffrey D. Parvin (Ohio State University) and was a kind gift of Catherine Millar (University of Manchester). These cells express the tet repressor and contain a single integrated copy of the pFRT/lacZeo plasmid (Invitrogen) (Gordon et al., 2009). U2OS-Flp-In/T-Rex/DRGFP cells were generated by transfecting the pDR-GFP expression plasmid (Pierce et al., 1999) into the U2OS-Flp-In/T-Rex cells. Stable integrants were selected with 1 µg/ml puromycin (Invivogen), 15 µg/ml Blasticidin S (Invivogen) and 100 µg/ml Zeocin (Invitrogen). Clones with best inducible expression were chosen for further studies.

The tetracycline inducible Flp-In gateway destination vector pDESTfrrto was generated by replacing the CMV promoter of the pcDNA5/FRT plasmid backbone (Invitrogen) with the CMV/TO promoter of pcDNA4/TO/myc-His A (Invitrogen) on an MluI/HindIII fragment. The Gateway conversion cassette RfA was then inserted into the EcoRV site of the resulting plasmid construct.



The KDM4A cDNA was purchased from Genecopoeia and was transferred into the pDESTfrtto plasmid with a Gateway LR reaction. U2OS-Flp-In/T-Rex and U2OS-Flp-In/T-Rex/DRGFP cells were co-transfected with the resulting KDM4A expression plasmid and pOG44 (Invitrogen) in a ratio of 1:9 using Fugene transfection reagent (Promega). 48 hours after transfection, cells were split and stable integrants were selected for by 100 µg/ml Hygromycin and 15 µg/ml Blasticidin. About 20 days after selection, colonies were isolated and expanded individually. Individual colonies were tested for KDM4A expression in response to Doxycycline by Western blotting. Cells expressing KDM4A under the control of the T-REx system were subsequently subjected to treatments.

### **Generation of cell lines expressing H3.3K36M**

The H3.3 and H3.3-K36M lentiviral plasmids were generous gifts from the laboratory of Dr David Allis (Lewis et al., 2013). Briefly, the lentiviral plasmids and viral packaging mix (System Biosciences) were co-transfected into 293T cells using lipofectamine transfection reagent (Invitrogen). Viral particles produced from 293T cells were collected and used to infect U2OS cells. Five days after viral infection, U2OS cells were selected for stable integration of the gene using Puromycin (5µg/ml). Stable cell lines were tested for H3.3 or H3.3-K36M expression by Western blotting and subsequently subjected to treatments.

### **siRNA Transfections**

The sequences of the siRNAs used in this project are: Non-targeting (NT) proprietary sequence of supplier (Qiagen). SETD2#3 (si#3) (Dharmacon):

GAAACCGUCUCCAGUCUGU; SETD2#5 (si#5) (Dharmacon):  
UAAAGGAGGUUAUAUCGAAU. RAD51 (Qiagen):  
AAGGGAAUUAGUGAAGCCAAA, CAGGAUAAAGCUUCCGGGAAA,  
CACUUCUAAAUUAUGGUAAA, CACGGUUAGAGCAGUGUGGCA. CtIP  
(Dharmacon): GAGGUUAUAUUAAGGAA, GGAGCUACCUCUAGUAU,  
GAACAGAAUAGGACUGA, GCACGUUGCCCAAAGAU,

All siRNAs (10nM final concentration) were delivered to the cells by RNAiMAX (Invitrogen) according to manufacturer's instructions.

### **Cell Survival assay**

400 U2OS or 200 HeLa cells were seeded per well of 6-well plates 48 hours post siRNA treatment. Cells were then treated with desired concentrations of DNA damaging reagents 6 hours after seeding. Mitomycin C (MMC) and Camptothecin (CPT) were purchased from Sigma. Ionising radiation (IR) was carried out by a caesium-137 irradiator at dose rate of 1.87Gy/min. Colonies were allowed to form for up to 14 days. Cells were then fixed and stained with Brilliant Blue (Sigma) and numbers of colonies were counted. Plating efficiency (PE) and surviving fraction (SF) were calculated according to (Franken et al., 2006), where  $PE = \text{number of colonies formed without treatment} / \text{number of cell seeded}$ , and  $SF = \text{number of colonies formed after treatment} / (\text{number of cell seeded} \times PE)$ .

### **Western blotting**

For histone western blots, proteins from whole cell lysates were separated by NuPAGE Bis-Tris gel (Invitrogen) and transferred to a nitrocellulose

membrane (0.2µm pore size) (Invitrogen). For western blot analysis of other proteins, whole cell lysate were separated by NuPAGE Tris-Acetate or Bis-Tris gel (Invitrogen) and transferred to a PVDF membrane (0.45µm pore size) (Invitrogen). After blocking, the membranes were incubated with appropriate primary antibodies at 4°C overnight followed by secondary antibodies at room temperature for 1 hour. Imaging and quantification of the amount of protein was performed by the Odyssey Infrared imaging system (LI-COR).

Primary antibodies used for western blotting are listed below: SETD2 (Abcam), H3K36me3 (Abcam), RAD51 (Santa Cruz), H3 (Abcam), LEDGF (Bethyl), CtIP (GeneTex), RPA32 (Abcam) and KDM4A (Cell Signaling). Secondary Alexa Fluor antibodies were purchased from Invitrogen.

### **Co-Immunoprecipitation**

U2OS cells were undamaged or damaged with either 15 µM camptothecin or 6 Gy IR, and allowed to repair for 4 and 2 hours respectively. Cells were lysed and pre-cleared with anti-rabbit serum and incubated overnight with 2-3µg of indicated antibody for immunoprecipitations at 4°C overnight. Antibodies used for co-IP were: H3K36me3 (Abcam ab 9050) and LEDGF (Bethyl A300-847A). Protein A beads were added to and incubated for further 2 hours. Beads were washed with 150mM salt buffers and the resulting eluate was subjected to electrophoresis and analysed by immunoblotting. Western blots were incubated with indicated antibodies at 1:1000 dilution and secondary HRP-conjugated antibodies at 1:3000 dilution.

## **HR and NHEJ Reporter assays**

Transfection of the plasmids encoding I-SceI was performed with Lipofectamine 2000 (Invitrogen) according to the manufacturer's instructions. Cells were left to repair the DSBs for 48 hours before analysing GFP positive cells by FACS (FACSCalibur). For FACS analysis, non-overlapping gates were defined by three populations of cells from the same cell line: normal cells, cells transfected with EGFP or DsRed plasmids. 20000 cells were analysed for each sample.

## **Immunofluorescence**

For repair foci analysis, U2OS cells were treated with DNA damaging reagent (10 $\mu$ M CPT for 2 hours or 5Gy IR) and left to recover for time indicated. Cells were fixed with 4% paraformaldehyde for 10 minutes and permeabilised with 0.5% Triton-X. After blocking in 3% BSA, cells were incubated at 4<sup>o</sup>C overnight with antibodies diluted in 3% BSA as following: RAD51 (Santa Cruz, sc-8349) 1:1000, RPA32 (Abcam, ab2175) 1:200 or  $\gamma$ H2AX (Upstate, 05-636) 1:1000. After washing with PBS, cells were incubated with secondary antibodies (Alexa Fluor dyes, Invitrogen) 1:1000 at room temperature for 1 hour. After washing and DAPI staining, fluorescence signals were visualised by Incell Analyzer 3.0 (GE healthcare) and number of foci per cell were analysed using Incell Analysis 3.5 software (GE healthcare).

## **ChIP analysis at I-SceI resection sites.**

Chromatin immunoprecipitations were performed as previously described (Zalmas et al., 2013). Briefly, U2OS DR-GFP cells were transfected with 2 $\mu$ g

of HA-I-SceI plasmid and cells were harvested for ChIP at various timepoints post-transfection, as indicated. For siRNA DR-GFP ChIPs, cells were treated with non-targeting (NT) or SETD2 siRNA for 72 h, trypsinised and allowed to re-plate before transfection with DNA for a further 18 hours. ChIPs were performed using species-matched non-specific immunoglobulins (NS) or specific antibodies against H3K36me3 (Abcam), SETD2 (Abcam), RPA (Millipore), RAD51 (Santa Cruz) and LEDGF (Bethyl). DNA was amplified with Paq5000 polymerase (Agilent) with specific primers pairs for promoter regions of DR-GFP primers (up, Isc, down) designed to amplify regions the DR-GFP cassette, as indicated. Primer sequences are available upon request. PCR settings were as follows: 95 °C for 3 min, 33 cycles of 95 °C for 30 s, 61 °C for 1 min, and 72°C for 1 min, and 72 °C for 5 min. Products were visualised on 2 % agarose gel with 0.5 µg/ml ethidium bromide. QPCR on ChIP samples was carried out on the Agilent MX3005P real-time PCR instrument. Brilliant III SYBR Green QPCP Mastermix was used according to manufacturer's instructions. IP data are shown as fold change of  $\Delta\Delta\text{Ct}$  over control treatment (non-Iscel induced; 0µg Iscel), after subtracting values from non-specific signals and normalising to input levels.

### **UV laser micro-irradiation**

Performed as indicated in (Suzuki et al., 2011). Briefly,  $2 \times 10^5$  cells were plated on a 22mm×22mm cover slip. After incubating in 10µM BrdU for 48 hours cells were covered with 5µm micropore membrane and exposed to  $30\text{Jm}^{-2}$  UV light at a dose rate of  $1\text{Jm}^{-2}\text{s}^{-1}$ . Irradiated cells were fixed 15 minutes after irradiation and stained with mouse anti-γH2AX (Upstate). Image acquisition was performed on a Zeiss LSM780 confocal microscope. Images

at excitation wavelength 488nm and 543nm were acquired individually. Image analysis was carried out on ImageJ.

### **In vivo DNA end resection assay**

DlvA cells (DSB Inducible via AsiSI, (Aymard et al., 2014)) were transfected with siRNA using the Cell Line Nucleofactor kit V (Amaxa) according to the manufacturer's instructions. The following siRNA were purchased from Eurogentec: SETD2 siRNA GUGAAGGAGUAUGCACGAAAtt; Control siRNA: CAUGUCAUGUGUCACAUCUtt. 48 hours after transfection, cells were treated or not with 300nM of 4-hydroxytamoxifen (Sigma; H7904) for 4h. DNA was next purified using Qiagen DNeasy kit according to manufacturer instruction (the Rnase A incubation step was added as recommended by the manufacturer). Single strand DNA generated at an AsiSI induced DSB was analyzed using the procedure described in (Zhou et al., 2014), with the following modifications. Briefly, for each sample, 100ng of extracted DNA was subjected to an RNaseH treatment for 15 min, and digested in 30µL with 16 Units of BanI, or mock digested (no enzyme) at 37°C overnight. Samples were heat inactivated at 65°C, and analyzed by qPCR. qPCR was performed on Biorad Device using 2µL of digested or mock digested samples, with the Takara Bio SYBR Premix Ex Taq (Tli RNase H Plus), and the following oligonucleotides:

DSBII\_231\_FW ACCATGAACGTGTTCCGAAT;

DSBII\_231\_REV GAGCTCCGCAAAGTTTCAAG;

DSBII\_918\_FW ACAGATCCAGAGCCACGAAA;

DSBII\_918\_REV CCCACTCTCAGCCTTCTCAG;

DSBII\_1656\_FW CCCTGGTGAGGGGAGAATC;

DSBII\_1656\_REV GCTGTCCGGGCTGTATTCTA.

The percent of Single Strand DNA was calculated with the following equation:

$ssDNA\% = 1/(2^{(\Delta Ct-1)} + 0.5)*100$  , where  $\Delta Ct$  is calculated by subtracting the Ct obtained from mock digested sample from the BanI digested sample.

### **ChIP analysis at AsiSI restriction sites**

ChIP assays were carried out according to the protocol described in (Iacovoni et al, 2010). Briefly, 200  $\mu$ g of chromatin was immunoprecipitated with an antibody against XRCC4 (Abcam, ab145) or without antibody (mock). Immunoprecipitated DNA and input DNA were analyzed by Real time quantitative PCR, using primer pair located at the vicinity of an AsiSI-induced DSB (DSB II in Aymard et al, 2014). XRCC4 ChIP was analyzed closer to the DSB (less than 100bp, FW: CCGCCAGAAAGTTTCCTAGA; REV CTCACCCTTG CAGCACTTG). ChIP efficiencies were calculated as percent of input DNA immunoprecipitated.



## **SUPPLEMENTAL REFERENCES**

Franken, N.A., Rodermond, H.M., Stap, J., Haveman, J., and van Bree, C. (2006). Clonogenic assay of cells in vitro. *Nature protocols* 1, 2315-2319.

Suzuki, K., Yamauchi, M., Oka, Y., Suzuki, M., and Yamashita, S. (2011). Creating localized DNA double-strand breaks with microirradiation. *Nature protocols* 6, 134-139.

Zalmas, L.P., Coutts, A.S., Helleday, T., and La Thangue, N.B. (2013). E2F-7 couples DNA damage-dependent transcription with the DNA repair process. *Cell Cycle* 12, 3037-3051.
